# Supplementary material for: Development and Validation of an Online Dynamic Nomogram for Predicting Nonobese Metabolic Dysfunction-associated fatty liver disease Based on Body Composition Analysis
Source: Research Square preprint supplement (doi:10.21203/rs.3.rs-7174767/v1), 2025-09-11
Supplement: Supplementary file 1 [file 8027b63562f2088c3bf63ac8.xlsx]

## Sheet: Sheet1
liver	female	age	history	waist	ALT	AST	GGT	GLU	TC	TG	HDL	VLDL	inw	exw	tbw	pro	mus	ffm	fat	pbf	vfa	whr	bmr	dPhaseAngle	dASMI
0	0	36	0	70	9	12	18	4.81	4.44	0.59	1.42	2.89	17.4	10.7	28.1	7.5	35.8	38.5	15.3	28.5	63.9	0.83	1200.7	5.324	5.965
0	0	61	0	64	24	20	18	6.37	3.90	0.74	1.99	1.54	15.5	9.9	25.4	6.7	32.3	34.5	11.7	25.3	52	0.84	1115.3	4.889	5.5
0	0	36	0	66.5	13	18	8	5.82	2.99	0.39	1.35	1.60	17.9	11.1	29	7.7	36.9	39.5	11.1	22	46.7	0.8	1222.7	5.677	6.432
0	0	60	0	71	25	30	42	5.04	4.54	2.09	0.96	2.72	15.3	9.5	24.8	6.6	31.6	33.7	14.7	30.3	69.3	0.84	1098.7	5.258	5.652
0	1	62	0	88	22	20	68	4.54	4.81	3.30	1.19	2.46	23.5	14.4	37.9	10.2	48.3	51.5	16.6	24.4	71.7	0.89	1481.7	6.231	7.72
0	1	54	1	80	20	20	20	5.32	4.60	1.02	1.83	2.49	21.6	13.4	35	9.3	44.6	47.6	13.6	22.3	59.1	0.87	1397.5	5.66	7.121
0	1	40	0	82	16	16	80	5.19	4.97	15.97	0.51	1.16	26.9	16.3	43.2	11.6	55.2	58.7	15.3	20.6	65.4	0.89	1638.5	5.919	8.235
0	0	39	0	70	12	15	16	5.31	3.95	0.79	1.69	1.98	19.3	11.7	31	8.3	39.5	42.3	16.4	27.9	71.8	0.87	1283.7	5.842	6.422
0	0	23	0	66	5	11	9	4.32	3.63	0.63	1.63	1.83	15.7	9.9	25.6	6.8	32.6	34.9	14.8	29.7	65.2	0.84	1124.7	4.629	5.551
0	0	26	0	72	13	21	11	4.85	3.85	0.50	2.27	1.48	18.5	11.5	30.1	8	38.3	41.1	17.6	30	78.1	0.86	1257.2	4.689	6.312
0	1	24	0	71	6	13	15	4.01	3.87	1.54	1.28	2.14	26.3	15.5	41.8	11.4	53.4	56.9	6.5	10.2	14.4	0.79	1599.8	6.597	8.27
0	1	29	0	81	53	27	18	4.90	3.18	0.54	1.23	1.70	23.9	14.5	38.3	10.3	48.9	52.2	14.4	21.6	60.3	0.86	1497.7	5.839	7.434
0	0	59	0	75	18	23	13	4.76	3.98	2.15	1.16	1.86	14.8	9.3	24.2	6.4	30.8	32.8	15.8	32.5	75.6	0.87	1078.4	5.042	5.289
0	0	42	0	75	12	16	12	4.31	4.97	0.93	1.65	3.11	18.3	11.5	29.9	7.9	38	40.7	18.7	31.5	86.2	0.88	1249.3	4.784	6.279
0	1	54	0	82	20	16	27	4.87	6.73	1.33	1.76	4.53	22.6	13.7	36.4	9.8	46.4	49.6	14.8	23	60	0.86	1441	6.162	7.371
0	0	38	0	73	8	14	7	4.42	4.23	0.78	1.48	2.53	18.7	11.8	30.5	8.1	38.8	41.5	17.2	29.3	76.6	0.85	1265.9	4.892	6.515
0	0	43	0	63	6	13	9	4.64	5.01	0.86	1.51	3.30	17.4	11.1	28.5	7.5	36.2	38.5	10.4	21.3	44.1	0.82	1201.3	5.038	6.352
0	0	40	0	73	14	18	19	5.06	5.06	1.03	1.76	2.92	19.8	12.5	32.3	8.6	41.1	43.9	20.1	31.4	92	0.9	1317.8	5.234	6.63
0	0	49	0	76	13	15	12	4.20	3.74	1.60	1.35	1.66	15.6	9.7	25.4	6.8	32.3	34.4	20.3	37	105.9	0.91	1114.1	5.44	5.615
0	1	38	0	90	24	17	57	5.70	5.46	3.53	0.90	2.88	25	15.1	40.1	10.8	51.2	54.6	19.7	26.5	87	0.93	1548.9	6.124	7.709
0	1	60	0	83	23	19	61	7.73	5.76	4.79	0.98	3.20	23.1	14.1	37.2	10	47.5	50.6	15.8	23.8	72.3	0.93	1463.5	5.945	7.192
0	0	45	0	77	14	16	54	4.86	3.94	3.14	0.73	2.28	18.6	11.5	30.1	8	38.4	41	20.3	33.1	92.5	0.86	1255.4	5.563	6.622
0	0	33	0	71	11	15	10	4.79	4.74	1.79	2.18	2.09	20.3	12.5	32.8	8.8	41.8	44.7	15.8	26.1	70.4	0.88	1335.6	5.441	6.516
0	0	40	0	72	17	16	15	4.60	4.76	1.30	1.59	2.75	18.6	11.2	29.8	8	38	40.7	13.3	24.5	53.2	0.83	1250.1	6.093	6.243
0	0	41	0	77	26	21	17	4.63	3.37	0.77	1.68	1.45	20.6	12.6	33.2	8.9	42.4	45.3	16.1	26.2	72.1	0.88	1348.5	5.663	6.778
0	1	61	0	68.5	14	17	19	4.19	3.91	1.35	1.25	2.18	20.5	12.6	33.1	8.9	42.2	45.1	8.1	15.2	29.4	0.83	1344.4	5.541	6.563
0	0	35	0	66	13	18	13	4.23	6.59	1.01	2.24	4.07	15.4	9.5	25	6.7	31.8	34.1	16.9	33.2	77.6	0.88	1105.5	4.783	5.29
0	1	56	0	84	27	18	48	7.14	3.96	0.99	1.36	2.28	22.1	14.1	36.1	9.5	45.9	48.3	17.1	26.1	95.4	0.94	1414.3	6.027	7.91
0	1	45	0	84	14	17	16	5.28	4.65	1.48	0.99	3.14	22.5	14	36.5	9.7	46.5	49.5	15.4	23.8	69.3	0.89	1438.5	5.612	7.225
0	0	51	0	80	14	21	13	4.49	4.59	1.07	1.54	2.71	18.2	11.5	29.7	7.9	37.8	40.3	22	35.2	103.1	0.9	1241.5	4.596	6.436
0	0	36	0	73	10	12	12	4.58	4.83	1.18	1.44	2.88	20.3	12.7	33.1	8.8	42.1	45.2	18.2	28.7	81.3	0.89	1346.5	4.612	6.363
0	0	65	0	74	22	34	25	5.24	5.93	0.85	1.63	4.05	17.3	10.6	27.9	7.5	35.6	38	20.1	34.6	93.6	0.91	1191	5.208	5.861
0	1	58	0	85	14	12	23	5.09	4.34	1.56	0.87	2.80	26.7	16.6	43.3	11.5	55.1	58.7	16	21.4	69.9	0.87	1638.2	5.482	8.397
0	0	59	0	71	55	38	125	4.91	6.66	2.51	1.31	4.23	17.1	10.7	27.9	7.4	35.5	37.8	16.8	30.7	77.4	0.9	1187.2	4.846	5.911
0	1	62	0	84	21	18	19	5.29	3.73	1.56	1.47	1.79	24	14.6	38.6	10.4	49.2	52.5	16.5	24	78.2	0.93	1503	6.432	7.282
0	1	60	0	82	11	12	17	5.21	6.01	1.09	1.06	4.61	20.6	12.8	33.4	8.9	42.5	45.4	12.4	21.4	55.8	0.89	1350.8	4.883	6.49
0	0	53	0	74.5	11	16	30	4.89	5.93	1.31	1.95	3.50	16.9	10.5	27.4	7.3	34.9	37.3	20.7	35.6	96.1	0.88	1176.5	4.768	5.97
0	1	52	1	90	18	20	24	5.05	5.97	1.24	1.30	4.03	28.1	17.1	45.2	12.1	57.7	61.3	19.2	23.8	88.9	0.96	1694.3	5.832	8.408
0	1	54	0	87	17	17	19	5.75	3.71	0.59	1.30	2.15	22.6	13.8	36.4	9.8	46.4	49.6	13.1	21	56.3	0.89	1440.4	5.853	7.215
0	0	52	0	68.5	20	22	13	4.43	5.44	0.65	2.08	3.35	17	10.6	27.5	7.3	35.1	37.6	15.4	29	69.2	0.86	1183.1	5.104	5.705
0	0	39	0	68	8	17	9	5.08	3.96	0.76	1.31	2.62	16.4	10.4	26.8	7.1	34.1	36.5	17.3	32.2	80.3	0.86	1158.4	4.984	5.765
0	1	74	0	85	10	16	94	4.95	4.74	1.50	1.25	2.84	22.7	14	36.7	9.8	46.7	50	34.9	41.2	165.6	1.02	1449.1	5.39	7.315
0	1	69	0	87	14	18	24	5.31	5.38	1.08	1.16	3.97	21.7	13	34.6	9.4	44.2	47.2	12.4	20.8	47	0.83	1390.1	6.049	7.106
0	1	71	0	81	25	17	37	5.53	6.01	1.24	1.91	3.66	24.1	15	39.1	10.4	49.8	53.1	14.7	21.7	65.4	0.88	1516.4	5.403	7.6
0	1	61	0	78	12	20	14	6.12	5.19	0.83	2.15	2.73	27.4	16.4	43.9	11.8	56	59.5	7.2	10.7	37.6	0.93	1656	6.372	7.868
0	1	53	0	77	20	20	40	5.01	4.70	0.89	1.22	3.31	26.4	15.6	42	11.4	53.7	57.2	10	14.9	33.2	0.8	1605.7	6.785	8.392
0	1	51	1	84	31	21	23	5.19	3.95	1.84	1.56	1.68	21.9	13.4	35.3	9.5	45	48	13.8	22.3	59.3	0.89	1407.6	5.394	7.08
0	1	81	0	77	10	15	14	4.54	4.17	1.30	2.00	1.80	17.3	11	28.3	7.5	35.9	38.2	11.5	23.1	48.8	0.83	1195.6	4.602	6.336
0	1	85	1	84	19	20	8	6.36	3.05	0.82	0.95	1.74	21.3	13.8	35.2	9.2	44.6	47.5	18.5	28	91.1	0.94	1396.3	4.524	7.279
0	1	84	0	80	37	42	15	5.02	4.65	1.71	1.17	2.90	19.9	12.4	32.3	8.6	41.2	43.9	13.6	23.7	59.1	0.86	1317.9	5.105	7.037
0	1	77	0	92	10	18	36	4.69	3.49	0.61	1.72	1.46	23.9	15.1	39	10.3	49.6	52.9	20.5	27.9	91.2	0.87	1513.1	5.191	7.751
0	1	78	1	87	11	20	13	6.39	5.76	1.99	1.11	4.00	22.6	14.6	37.2	9.8	47.3	50.5	14.5	22.4	65.4	0.87	1459.8	4.653	7.248
0	1	46	0	82	13	16	23	4.47	5.01	2.74	0.99	3.08	24.1	14.4	38.5	10.4	49.2	52.6	9.9	15.9	41.3	0.87	1505.6	6.286	7.245
0	1	63	1	90	7	16	19	4.73	2.61	0.88	0.81	1.52	23.1	14.3	37.4	10	47.7	51.1	16.7	24.6	76.1	0.9	1473.7	5.365	7.012
0	0	58	0	65.5	14	22	13	4.80	4.63	1.38	1.34	2.66	15.5	9.5	25.1	6.7	31.9	34	11.9	25.8	50.4	0.82	1105.4	5.47	5.634
0	1	54	0	82	12	13	28	5.10	4.35	0.88	1.39	2.57	20.8	12.5	33.3	9	42.5	45.3	14.5	24.2	59.8	0.87	1348.6	5.822	6.893
0	1	46	0	89	21	29	14	4.27	4.70	1.24	1.44	2.85	26.4	16.3	42.7	11.4	54.4	58.1	16.5	22.2	76.6	0.92	1624.3	5.464	7.82
0	0	43	0	69.5	14	13	15	5.60	4.84	0.88	1.71	2.64	17	10.5	27.5	7.3	35.1	37.6	17.6	31.9	79.8	0.88	1182.1	4.92	5.749
0	1	59	1	87	9	19	37	6.73	5.09	1.28	1.47	3.36	22.9	13.8	36.7	9.9	46.8	49.9	16.6	25	72.5	0.89	1447.7	6.294	7.506
0	0	36	0	77	9	16	17	4.97	4.33	1.71	1.04	2.93	17.6	10.8	28.3	7.6	36.1	38.7	19.4	33.5	90.4	0.88	1204.9	5.461	6.042
0	0	36	0	72	46	25	9	4.70	4.75	0.77	1.70	2.93	18.1	11.1	29.2	7.8	37.2	39.7	18	31.1	82.3	0.87	1228.5	5.082	6.373
0	0	48	0	77.5	17	21	41	5.41	5.90	2.77	1.59	3.31	19.3	11.6	31	8.4	39.6	42.3	16.5	28	71	0.86	1284.6	5.345	6.393
0	1	61	1	89	19	23	32	5.10	6.63	3.15	1.10	4.32	25.9	15.9	41.8	11.2	53.3	56.8	18.5	24.6	75.8	0.86	1597.1	6.009	8.283
0	1	73	0	90	13	17	17	4.97	4.48	1.59	1.25	2.77	20.3	12.7	33	8.8	42	44.7	18.4	29.1	85.3	0.92	1335.8	5.093	6.898
0	0	35	0	67	19	19	9	4.48	4.36	0.59	1.70	2.49	15.5	9.7	25.2	6.7	32.2	34.4	14.6	29.7	62	0.79	1113.9	5.209	5.729
0	0	40	0	65	8	15	13	5.12	5.38	0.64	2.37	2.97	17.2	10.6	27.8	7.4	35.5	38	12.6	24.8	50.2	0.81	1191.9	5.258	5.906
0	0	38	0	71	25	20	22	4.74	5.51	2.03	2.29	2.53	17.9	11.2	29.1	7.7	37	39.7	15.2	27.8	67.5	0.86	1226.5	5.175	6.032
0	1	50	0	83	14	14	13	4.24	3.99	0.73	1.15	2.68	25.1	15.1	40.2	10.8	51.3	54.8	14.6	21	62.8	0.9	1554.4	6.138	7.431
0	1	55	1	83	22	23	40	5.22	4.57	5.68	0.70	1.53	26.1	15.4	41.6	11.3	53.2	56.7	16.9	23	72.9	0.9	1594.1	6.512	7.771
0	0	40	0	69	14	21	20	4.33	4.94	1.24	1.57	2.87	17.4	10.6	27.9	7.5	35.6	38.1	16.2	29.9	72.1	0.86	1192.6	5.605	5.994
0	0	39	0	75	13	15	9	4.21	5.32	0.64	1.77	3.29	20.4	12.2	32.6	8.8	41.6	44.5	14.1	24.1	57.4	0.84	1330.9	5.854	6.806
0	0	38	0	70	8	10	8	4.74	5.21	0.66	1.82	3.21	17.4	10.8	28.2	7.5	35.9	38.6	13.7	26.2	55	0.8	1203.3	5.007	6.07
0	1	61	0	85	30	29	34	5.68	5.84	2.25	1.62	3.64	25.7	15.9	41.6	11.1	53	56.5	13.6	19.4	58.6	0.89	1591.1	5.593	7.973
0	0	54	0	63.5	18	18	12	5.07	6.66	1.07	1.53	4.78	16.7	10.2	26.9	7.2	34.3	36.6	10.7	22.6	40.8	0.81	1161	5.935	6
0	0	45	0	83.5	70	36	15	4.49	3.28	1.47	1.31	1.31	19.4	11.9	31.3	8.4	40	42.9	21	32.9	96	0.92	1295.9	5.216	6.306
0	0	56	0	73	16	23	14	4.92	4.16	0.93	1.34	2.45	19.6	12	31.7	8.5	40.4	43.2	14.9	25.7	64	0.86	1303	5.268	6.592
0	1	44	0	92.5	56	41	142	4.82	5.80	1.17	1.14	4.09	26	15.9	41.9	11.2	53.4	57	20.2	26.2	95.7	0.98	1601.2	5.414	7.432
0	0	45	0	79.5	18	17	14	4.69	3.03	0.62	1.59	1.20	18.8	11.5	30.2	8.1	38.6	41.4	20.4	33	90.7	0.89	1264.7	5.008	6.188
0	0	31	0	66.5	15	20	20	5.11	4.16	0.88	1.61	2.12	18.4	11.1	29.5	7.9	37.6	40.4	12.5	23.7	45.9	0.79	1242.3	5.518	6.263
0	1	52	0	82	15	18	45	4.45	4.63	1.01	1.21	3.04	25.7	15.3	41	11.1	52.4	55.8	14.8	20.9	59.8	0.86	1575.7	6.925	8.153
0	0	33	0	73.5	13	18	12	4.41	3.60	0.54	1.45	2.13	17.3	10.5	27.8	7.5	35.5	38	18.2	32.4	82.5	0.86	1190.6	5.574	5.932
0	0	42	0	73	42	29	34	4.25	5.67	1.37	1.50	3.69	15.8	9.9	25.7	6.8	32.7	35	16.3	31.8	76.2	0.89	1125.2	4.752	5.397
0	0	47	0	72.5	14	18	48	5.24	5.89	1.37	1.61	3.71	16.4	10.2	26.6	7.1	33.9	36.3	19.4	34.8	93.6	0.9	1154.3	5.235	5.524
0	1	56	0	87	22	19	24	5.15	4.46	5.21	0.72	1.71	24.8	15	39.8	10.7	50.8	54.1	16.1	23	72.6	0.94	1538.2	6.266	7.584
0	0	64	1	81	16	21	13	4.70	3.78	1.40	1.55	1.87	18.6	11.9	30.4	8	38.7	41.3	20.9	33.6	101.5	0.94	1262.6	4.562	6.245
0	0	42	0	70	13	16	12	4.64	4.38	0.94	1.37	2.71	17.8	11.1	28.9	7.7	36.8	39.4	18.3	31.7	82.9	0.88	1221.4	4.912	5.984
0	0	59	0	68	20	22	18	4.88	6.37	1.36	1.73	4.32	15.5	9.8	25.3	6.7	32.2	34.4	18.5	34.9	90.6	0.87	1113.9	4.953	5.626
0	0	41	0	72	25	24	12	4.70	4.73	1.57	1.40	2.70	18.2	10.9	29	7.8	37.1	39.6	17.5	30.7	79.6	0.88	1224.8	6.113	6.265
0	0	54	0	69	12	16	8	4.54	6.51	0.76	1.83	4.50	17.6	10.8	28.4	7.6	36.2	38.8	16.4	29.7	72.9	0.86	1208.2	5.156	6.042
0	0	31	0	62.5	8	13	10	4.80	4.75	0.87	1.89	2.53	16.9	10.5	27.4	7.3	35	37.5	8.9	19.3	33.8	0.82	1179	5.151	5.591
0	0	49	0	67	18	20	15	4.88	4.50	0.75	1.38	2.86	15.9	9.7	25.6	6.9	32.7	34.8	14.3	29.2	67.1	0.86	1121.4	5.819	5.651
0	0	31	0	81	38	25	13	3.69	5.52	0.59	1.84	3.34	20.3	12.5	32.8	8.8	41.8	44.8	21.7	32.6	94.9	0.89	1338.4	5.126	6.616
0	1	40	0	82	21	17	31	4.51	5.91	4.16	1.16	3.16	24.5	14.4	38.9	10.6	49.8	53.1	17.9	25.2	73.4	0.88	1517.3	6.265	7.666
0	1	43	0	74	12	15	7	4.70	4.66	0.66	1.86	2.65	23.8	14.7	38.4	10.3	49	52.3	7.1	12	21.3	0.76	1499.7	5.685	7.804
0	1	59	0	80	14	16	37	9.10	5.60	2.86	1.57	3.49	22.2	13.5	35.7	9.6	45.6	48.7	14.8	23.4	62.3	0.87	1421.3	5.996	7.04
0	0	53	0	71	21	18	40	5.45	6.18	0.96	1.50	4.24	16.1	9.8	25.9	6.9	33	35.3	19.5	35.6	96.9	0.91	1132.1	5.439	5.485
0	0	43	0	68.5	10	12	10	4.48	6.10	0.65	1.95	4.14	17.3	10.7	28	7.5	35.7	38.2	16.3	30	73.6	0.87	1194.2	4.96	5.977
0	1	66	0	82	17	16	13	4.97	5.12	0.95	1.70	3.21	23.1	14.5	37.6	10	47.9	51.1	13.9	21.4	62.9	0.88	1473.5	5.386	7.459
0	0	43	0	65	14	19	22	4.89	4.51	0.74	1.63	2.65	19	11.9	30.9	8.2	39.3	42.1	14.9	26.2	66	0.86	1278.6	5.129	6.265
0	1	48	0	89	34	18	40	5.14	3.54	1.20	0.84	2.29	27.5	16.6	44.1	11.9	56.2	59.9	17.7	22.8	77.6	0.89	1663.8	6.232	8.302
0	1	61	1	88.5	15	16	24	5.38	5.62	1.07	1.51	3.98	25	15.6	40.6	10.8	51.7	54.9	15.5	22	70.3	0.9	1556.5	5.737	8.22
0	0	51	0	68.5	9	13	24	4.64	5.15	0.63	2.09	2.81	17.3	10.6	28	7.5	35.6	38.1	12.7	25.1	52.4	0.82	1192.2	5.185	6.208
0	1	40	0	88	44	22	60	4.62	5.79	1.17	1.21	4.07	26	15.6	41.6	11.3	53.2	56.7	17.9	24	77.8	0.9	1595.3	6.029	7.733
0	1	36	0	70	27	17	54	4.33	4.32	1.33	1.18	2.77	21.7	13.1	34.8	9.4	44.4	47.5	9.8	17.2	34.3	0.82	1395.1	5.874	6.983
0	1	31	0	82	16	18	21	4.52	4.39	0.79	1.47	2.70	25.9	16	41.8	11.2	53.3	57	16.3	22.2	68.9	0.86	1602.2	5.153	7.839
0	1	35	0	84	49	28	51	4.88	8.54	2.08	1.88	6.29	23.5	13.8	37.3	10.2	47.8	51	15.9	23.8	67.9	0.91	1470.9	6.64	7.239
0	1	60	0	88	13	17	15	4.92	4.18	0.83	1.41	2.50	22.9	14.1	37	9.9	47.1	50.1	14.7	22.6	61.6	0.87	1453	5.558	7.629
0	0	40	0	74	17	17	18	5.41	5.42	1.70	1.35	3.51	18.4	11.1	29.5	7.9	37.7	40.4	18.6	31.6	83	0.88	1241.8	5.552	6.126
0	0	28	0	57	8	12	8	4.45	4.84	0.75	2.25	2.53	15.3	9.7	25	6.6	31.8	34	9.2	21.3	35.6	0.79	1104.5	4.175	5.424
0	0	29	0	72	12	13	18	4.44	4.35	0.58	1.36	2.77	17.6	10.6	28.2	7.6	36	38.5	18	31.8	82.2	0.89	1201.7	5.982	5.773
0	0	36	0	73	9	12	12	4.44	4.47	1.25	1.74	2.47	16.1	9.7	25.8	7	33	35.4	20.2	36.3	99	0.91	1134.5	5.362	5.399
0	1	39	0	84	16	23	19	5.06	5.12	1.09	1.13	3.45	29.3	17.5	46.8	12.7	59.8	63.6	13.2	17.2	57.1	0.88	1743.1	6.542	8.694
0	0	34	0	72	10	15	9	4.46	4.32	0.91	2.14	2.10	17.2	10.8	28	7.5	35.7	38.2	15.3	28.6	69	0.85	1195.3	5.38	5.97
0	1	46	0	84	28	22	45	5.33	5.33	1.14	1.27	3.94	21.1	13.1	34.3	9.1	43.6	46.5	20.9	31	97.2	0.96	1374.4	5.25	6.706
0	1	35	0	80	12	14	24	5.30	4.46	2.09	1.02	2.82	22.9	14.3	37.2	9.9	47.4	50.3	12	19.2	55	0.89	1457.5	6.118	7.323
0	0	30	0	68	16	24	43	4.45	4.32	1.98	0.99	2.40	19	11.9	30.9	8.2	39.3	42.1	16.1	27.7	70	0.84	1278.4	5.142	6.455
0	0	59	0	77.5	14	14	34	6.12	4.80	2.62	1.11	2.40	18.9	11.6	30.5	8.2	38.9	41.6	18.3	30.6	86.5	0.9	1267.6	5.281	6.349
0	1	60	0	90	21	14	25	5.80	4.74	1.25	1.39	3.17	22	13.6	35.6	9.5	45.3	48.2	18	27.2	78.4	0.87	1411.4	5.345	7.565
0	1	69	0	83	13	18	31	5.85	5.10	1.38	1.38	3.43	22.9	13.6	36.5	9.9	46.6	49.8	14.3	22.3	57.2	0.87	1445.2	6.296	7.349
0	1	31	0	84	25	14	19	4.53	3.58	0.70	1.25	2.07	26.5	15.5	42	11.5	53.8	57.5	15.3	21	58.6	0.84	1611.7	6.708	8.051
0	0	27	0	67.5	7	14	18	4.73	5.44	1.25	2.34	3.03	13.8	8.6	22.4	6	28.5	30.6	17.3	36.2	81.6	0.88	1030.3	4.7	4.821
0	0	32	0	79.5	8	12	11	4.81	4.18	0.94	1.52	2.57	19.6	12.2	31.8	8.5	40.5	43.4	22.2	33.8	100.7	0.9	1308	4.887	6.479
0	1	49	1	85	10	17	26	4.30	4.90	1.57	1.20	3.03	24.1	14.5	38.6	10.4	49.3	52.4	13.5	20.5	56.8	0.88	1502.3	6.573	7.757
0	1	46	0	79	17	20	133	4.91	5.49	2.70	1.55	3.10	21.9	13.7	35.6	9.5	45.3	48.1	18.9	28.2	86.5	0.93	1409.7	5.765	7.145
0	0	46	0	67	9	11	22	4.99	4.06	0.67	1.35	2.50	15.8	9.9	25.7	6.8	32.8	34.9	16.9	32.7	80.5	0.89	1123.5	5.022	5.657
0	0	39	0	65	10	15	7	4.89	4.11	0.87	1.43	2.37	16.7	10.1	26.8	7.2	34.2	36.7	14.7	28.7	60.9	0.84	1162	5.424	5.7
0	1	49	1	75	8	18	34	5.19	5.69	1.81	2.00	3.34	18.1	11.1	29.2	7.8	37.2	39.6	9.3	18.9	36.8	0.85	1226.3	5.979	6.005
0	1	39	0	76	13	14	17	4.98	5.12	1.60	1.33	3.26	23.6	13.9	37.5	10.2	48	51.1	12.4	19.5	47.4	0.85	1473.8	6.778	7.53
0	0	33	0	65	9	14	10	4.42	3.89	0.69	2.00	1.80	16.2	9.8	26	7	33.2	35.6	10.5	22.9	41.1	0.82	1138.2	5.252	5.483
0	1	44	0	86	26	19	20	5.00	4.88	1.32	1.37	3.16	27.6	16.1	43.7	11.9	55.9	59.5	14.1	19.2	59.4	0.89	1655.2	7.154	8.256
0	0	31	0	74	12	14	21	4.71	4.71	2.01	1.35	3.03	18.6	11.4	30	8	38.3	41	21.4	34.3	98.7	0.92	1255.8	5.359	6.105
0	1	59	0	85	28	25	18	5.42	4.35	0.59	1.90	2.18	25.2	15.3	40.5	10.9	51.7	55.1	11.1	16.8	48.4	0.88	1560.3	6.254	7.752
0	1	43	0	78	15	19	10	5.23	4.76	0.83	1.26	3.17	22.5	13.1	35.6	9.7	45.6	48.4	11	18.5	41.3	0.86	1416.1	7.338	7.355
0	1	41	0	82	14	18	18	4.74	4.43	0.86	1.39	2.61	27.5	16.3	43.8	11.9	56	59.7	11.1	15.7	46	0.86	1659.1	6.39	8.146
0	0	43	0	72	10	18	17	5.53	4.78	1.57	1.68	2.31	13	8.4	21.4	5.6	27.2	29.2	17.9	37.9	91.6	0.88	1001.5	3.963	4.554
0	1	52	1	83	55	41	69	4.78	4.85	3.09	0.96	3.01	25.8	16.2	42	11.2	53.5	56.8	13.7	19.4	62	0.9	1597.3	5.029	8.283
0	1	32	0	77	10	19	10	4.23	6.27	0.92	1.51	4.50	20.8	12.3	33	9	42.3	45.2	9.5	17.4	31.8	0.82	1345.6	6.343	6.687
0	0	30	0	74	32	24	54	4.93	3.17	0.94	1.03	1.94	17.7	10.5	28.3	7.7	36.1	38.7	18.8	32.7	84.1	0.88	1206.1	5.729	5.86
0	0	39	0	67.5	10	13	16	4.79	5.83	1.17	1.57	4.02	16.6	10.4	27	7.2	34.4	36.8	18.6	33.5	86.1	0.91	1165.9	4.583	5.393
0	0	43	0	72	21	22	18	4.78	6.12	1.80	1.68	4.18	18.7	11.5	30.2	8.1	38.6	41.2	13.6	24.9	56.8	0.84	1259.2	5.286	6.417
0	1	53	0	85	9	13	16	5.59	6.16	1.45	1.48	4.48	24.4	14.9	39.3	10.5	50.1	53.4	14.5	21.4	62.6	0.89	1522.5	5.727	7.726
0	0	67	0	68	11	16	17	8.24	5.31	0.78	1.54	3.55	16.7	10.4	27.1	7.2	34.5	36.9	8.3	18.3	31.1	0.8	1167.2	4.94	5.732
0	0	45	0	67.5	8	13	7	4.85	3.48	0.76	1.27	2.01	17.7	11.1	28.8	7.6	36.7	39.3	14.7	27.2	65.4	0.86	1219.7	4.762	5.877
0	0	62	0	75	20	22	33	4.69	6.12	1.56	1.77	3.94	16.6	10.6	27.1	7.2	34.5	36.9	14.9	28.8	70.4	0.91	1166.3	4.352	5.575
0	1	54	0	76	32	22	49	4.36	5.74	0.67	1.85	3.66	28.1	16.9	45	12.1	57.4	61.1	9.4	13.4	43	0.87	1689.3	6.545	8.345
0	0	69	1	85	12	16	18	6.09	4.98	0.99	1.76	3.05	18.1	11.1	29.2	7.8	37.3	39.9	19.3	32.6	92.7	0.93	1231.7	5.431	5.881
0	1	62	0	78	9	12	10	6.73	5.14	0.92	1.39	3.49	23.7	14.7	38.3	10.2	48.8	52	13.4	20.5	62.5	0.9	1492.5	5.482	7.432
0	0	60	0	66	28	28	31	6.75	4.95	1.19	1.37	3.32	16.3	10.2	26.4	7	33.6	35.8	16.6	31.7	92.4	0.92	1142.9	5.083	6.404
0	1	50	0	83	11	23	14	5.44	4.10	1.58	1.15	2.51	23.5	14.2	37.7	10.2	48.2	51.4	15.6	23.3	64.7	0.88	1480.6	6.06	7.493
0	1	60	0	86	30	24	50	5.05	4.05	1.24	1.05	2.82	25.7	15.7	41.4	11.1	52.8	56.4	16.5	22.7	74.9	0.89	1587.7	5.814	8.007
0	1	48	0	79	15	19	27	4.67	4.71	1.51	1.76	2.74	24.2	14.9	39.1	10.4	49.8	53.2	13.5	20.3	61	0.88	1518.3	5.702	7.327
0	0	53	0	73.5	19	24	11	4.38	2.93	1.17	1.27	1.26	18.8	11.7	30.4	8.1	38.8	41.4	20.7	33.3	95.4	0.89	1264.3	5.193	6.6
0	1	25	0	87	8	20	15	4.82	4.15	0.40	1.38	2.73	27.3	16.3	43.6	11.8	55.8	59.7	14.9	19.9	52.6	0.78	1660.3	6.197	8.52
0	0	27	0	72	11	14	11	4.93	4.04	0.95	1.21	2.67	21.2	12.7	33.9	9.2	43.4	46.5	17.9	27.8	75.8	0.87	1374.2	5.336	6.787
0	1	33	1	86	12	21	14	5.04	4.64	0.84	1.29	3.20	25.3	15.1	40.5	10.9	51.7	55	16.5	23.1	70.5	0.9	1558.4	6.321	7.749
0	1	42	0	84	19	18	13	4.78	4.62	0.79	1.23	3.27	24.3	15.2	39.5	10.5	50.3	53.7	14.7	21.5	69.4	0.91	1530.2	5.489	7.313
0	1	43	1	82	11	14	19	5.57	3.93	1.33	1.08	2.47	25.2	15.3	40.6	10.9	51.8	55.2	16.4	22.9	70	0.89	1562.6	6.058	7.914
0	0	28	0	78.5	12	15	11	4.98	5.43	1.41	1.21	3.97	18.1	11.2	29.3	7.8	37.3	40	21.6	35.1	100.3	0.89	1233.7	4.978	6.187
0	0	29	0	65	14	17	14	4.74	4.92	0.92	2.07	2.81	17.7	10.7	28.4	7.7	36.3	39	12.9	24.8	51.8	0.83	1213.2	5.344	5.732
0	0	25	0	59.5	7	16	9	4.48	4.65	0.55	1.98	2.53	15	9	24	6.5	30.6	32.8	9.2	21.8	31.4	0.79	1079.2	5.071	5.146
0	0	29	0	66	9	11	12	3.86	4.69	0.79	1.61	2.92	16.1	9.9	26	7	33.2	35.6	15.4	30.1	66.8	0.84	1139.8	5.156	5.487
0	1	30	0	85	15	18	25	4.18	5.28	0.60	1.39	3.77	28.8	17.2	46	12.4	58.7	62.7	15.8	20.2	77.1	0.97	1723.4	6.308	7.955
0	1	42	0	87	12	12	15	5.09	4.85	1.78	1.04	3.08	24.2	14.3	38.5	10.5	49.2	52.5	17.1	24.6	72.5	0.89	1503.4	6.515	7.46
0	1	37	0	73	24	21	47	4.84	3.90	0.95	1.29	2.31	22.4	13.5	35.9	9.7	45.8	48.8	9.1	15.8	38.1	0.86	1423.6	6.081	6.96
0	0	30	0	71	11	14	16	4.70	4.15	0.82	1.42	2.43	18.6	11.2	29.8	8	38	40.7	13.4	24.8	55.3	0.84	1248.8	5.528	6.161
0	0	37	0	71	9	14	13	4.61	4.51	1.02	1.91	2.33	17.7	11	28.7	7.6	36.6	39.2	16.2	29.3	73.2	0.88	1216.1	4.841	5.879
0	0	40	0	76	11	16	13	4.74	5.27	1.57	1.39	3.28	16.9	10.2	27.1	7.3	34.6	37	16.4	30.7	74.2	0.87	1168.8	5.774	5.734
0	0	43	0	73	11	14	13	5.01	4.14	1.18	1.43	2.29	19.1	12.1	31.2	8.3	39.7	42.5	17.4	29	77.5	0.88	1288.5	4.489	6.258
0	0	29	0	63	10	12	26	4.85	3.51	0.44	1.58	1.69	18.2	11.4	29.6	7.9	37.7	40.5	11.3	21.8	47.6	0.83	1244.7	5.182	5.865
0	1	24	0	76	25	18	16	3.94	4.77	1.20	1.22	3.22	24.9	14.6	39.5	10.8	50.5	53.8	9.8	15.4	39	0.87	1532	6.919	7.505
0	0	28	0	69	9	13	13	4.54	5.03	0.74	1.88	2.82	16.2	10.2	26.4	7	33.6	35.9	16.1	30.9	73.7	0.86	1145.8	5.081	5.621
0	1	36	0	75	11	16	15	4.63	4.46	0.92	1.69	2.72	20.2	12.2	32.4	8.7	41.4	44.2	10.6	19.3	40.1	0.84	1324.8	5.514	6.521
0	1	30	0	76	18	18	17	4.97	5.35	1.28	1.17	3.84	26.2	15.4	41.7	11.3	53.3	56.9	11.1	16.3	38.7	0.83	1599.5	6.887	7.968
0	0	50	0	76	12	13	11	4.49	4.33	0.72	1.62	2.54	21.8	13.8	35.5	9.4	45.2	48.3	16.9	25.9	75.4	0.86	1414	4.854	7.252
0	0	33	0	68	11	20	7	3.97	4.03	0.53	1.42	2.49	17.9	11	28.9	7.7	36.9	39.5	13.9	26.1	58.8	0.85	1222.9	5.124	6.116
0	1	50	0	74	13	18	25	5.32	5.59	1.97	1.23	3.77	23.2	13.7	36.8	10	47.1	50.1	9.8	16.3	36.1	0.82	1452.7	6.662	7.453
0	1	23	0	66	12	25	12	4.31	4.00	0.89	1.48	2.46	21.4	12.8	34.3	9.3	43.8	46.8	4.6	9	12	0.77	1380.6	5.89	6.769
0	0	45	0	74	15	18	19	4.82	6.08	0.88	2.04	4.01	17.2	10.7	27.9	7.4	35.5	38	16	29.6	70.7	0.85	1190.6	5.05	5.931
0	0	35	0	66	9	14	9	4.23	4.37	0.78	1.42	2.81	16.3	10.1	26.4	7	33.6	36.1	7.9	18	26.2	0.78	1149	5.031	5.598
0	0	51	0	72	13	19	21	4.89	5.97	1.80	1.31	4.30	17.1	10.5	27.6	7.4	35.2	37.7	16	29.8	73.2	0.89	1184.2	5.244	5.775
0	0	56	0	64	12	21	7	6.01	5.82	0.63	2.09	3.48	16.9	10.6	27.5	7.3	35	37.3	14.2	27.6	64.5	0.86	1175.3	5.159	5.982
0	0	55	1	73	40	34	19	4.98	4.65	0.77	1.30	2.87	14.7	9.2	23.9	6.4	30.5	32.5	16.2	33.3	83.3	0.89	1071.8	5.744	5.21
0	0	56	0	68	13	18	9	4.72	6.25	0.73	1.76	4.13	15.7	9.9	25.7	6.8	32.6	34.9	17	32.8	80.7	0.86	1123.4	4.921	5.659
0	0	56	0	72	13	14	18	8.38	5.52	1.60	1.28	3.59	19.4	12.1	31.5	8.4	40.2	42.8	8.2	16	30.1	0.81	1295.3	5.699	6.536
0	0	57	0	72	18	22	20	4.40	5.29	0.73	2.06	2.94	15.9	10.4	26.3	6.9	33.4	35.6	18.9	34.6	90.9	0.89	1139.7	4.122	5.783
0	1	39	0	81	11	18	15	5.64	4.11	0.54	1.55	2.22	24.6	14.5	39.1	10.6	50	53.1	10.4	16.3	36.5	0.84	1517.8	6.747	7.988
0	0	38	0	59	8	9	9	4.94	3.76	0.68	1.57	2.03	14.8	9.5	24.3	6.4	30.8	32.8	11.1	25.2	47.9	0.82	1079.5	4.625	5.434
0	1	46	0	80	12	15	9	4.43	5.19	0.67	1.54	3.25	24.4	14.5	38.9	10.5	49.7	52.9	8.2	13.5	30.7	0.83	1511.9	6.632	7.668
0	0	44	0	68	16	18	27	4.88	5.72	0.69	2.34	3.33	16.1	9.9	26	6.9	33.1	35.5	12.8	26.5	56.4	0.86	1136.4	5.267	5.379
0	1	46	0	87	11	22	91	4.94	5.65	1.45	1.24	3.71	24.9	15.2	40.2	10.8	51.2	54.6	15.1	21.6	74.1	0.93	1550.2	6.24	7.536
0	0	44	1	75.5	11	13	19	5.28	5.28	1.23	2.35	2.54	18.7	11.4	30.1	8.1	38.4	41	21.4	34.2	97.9	0.88	1256.3	5.241	6.533
0	1	59	1	86	20	14	27	4.96	4.62	0.91	1.77	2.48	22.9	14	36.8	9.9	47	50	17.7	26.1	76.9	0.87	1450.1	6.251	7.518
0	0	31	0	68	12	11	7	4.81	4.03	0.84	1.63	2.11	15.6	9.8	25.4	6.8	32.4	34.8	13.2	27.5	54.8	0.81	1121.3	4.596	5.435
0	0	41	0	63.5	7	11	11	5.36	4.95	0.53	2.10	2.68	15.7	10	25.7	6.8	32.7	34.9	12.4	26.3	54.7	0.83	1123	4.85	5.684
0	0	38	0	64	12	20	19	4.29	3.98	2.26	1.05	2.34	13.8	8.6	22.5	6	28.6	30.7	14.9	32.8	69.7	0.82	1032.1	4.668	4.934
0	0	37	0	70	39	21	14	5.38	5.42	1.38	1.26	3.71	15	9.5	24.5	6.5	31.2	33.4	19.4	36.8	92.2	0.88	1090.9	4.775	5.312
0	1	28	0	77	11	17	16	5.20	5.31	0.82	1.08	3.73	22.2	13.1	35.3	9.6	45.1	48.1	18.3	27.6	78.8	0.91	1408	6.608	7.124
0	0	25	0	63	7	15	7	4.53	4.68	0.43	1.33	3.26	12.6	7.7	20.3	5.4	25.9	27.8	13	31.9	57.8	0.78	970.4	4.703	4.656
0	1	38	0	85	21	15	12	5.12	5.31	1.07	1.11	3.69	29	17.1	46.1	12.5	59	63	17.7	21.9	75.1	0.88	1730.8	6.422	8.574
0	0	37	0	70	31	20	14	4.31	5.30	0.72	1.85	3.25	17.6	11	28.7	7.6	36.5	39.2	14.2	26.7	62	0.85	1215.8	4.478	5.903
0	0	53	0	68.5	14	22	16	3.97	4.18	0.66	1.09	2.70	17.8	10.9	28.7	7.7	36.7	39.3	8.7	18.1	30	0.78	1218.9	5.846	6.119
0	1	36	0	87	22	15	17	5.14	5.73	1.52	1.17	3.99	25.4	15.6	41	11	52.3	56	22.6	28.8	103.5	0.97	1578.7	5.356	7.451
0	1	50	0	87	18	30	20	4.74	6.19	0.83	1.87	4.02	25.9	15.7	41.6	11.2	53	56.6	14.7	20.6	63.2	0.89	1593.1	6.426	7.807
0	0	45	0	71	11	15	8	4.91	3.90	0.61	1.60	2.14	19.4	12	31.4	8.4	40	42.8	18.1	29.7	78.4	0.86	1294.8	5.082	6.456
0	0	45	0	73.5	13	16	13	4.58	5.59	0.55	1.31	3.91	19.4	11.7	31	8.4	39.6	42.3	17.9	29.7	81.3	0.9	1284.1	6.127	6.378
0	0	41	0	75	31	25	12	5.01	4.14	1.24	1.24	2.70	15.3	9.5	24.7	6.6	31.5	33.7	19	36	93.1	0.88	1098.9	5.187	5.321
0	0	57	0	68	25	22	18	5.15	5.85	0.70	2.67	2.78	17	10.5	27.5	7.4	35.1	37.5	18.3	32.8	84.1	0.9	1180.5	4.942	5.789
0	1	57	0	80	16	15	12	5.03	4.17	0.63	1.56	2.35	22.6	13.9	36.5	9.8	46.5	49.7	17.5	26.1	77.9	0.9	1442.8	5.662	7.21
0	1	49	0	79	54	36	44	5.98	4.19	0.74	1.22	2.49	21.5	13.1	34.6	9.3	44.1	47	13.2	22	57.8	0.89	1384.8	5.946	6.817
0	0	46	0	69.5	14	15	13	4.05	3.58	0.91	2.14	1.07	14.1	8.8	22.8	6.1	29.1	31.1	16.1	34.1	76.6	0.88	1042.2	4.7	4.898
0	0	38	0	65.5	8	14	7	5.50	4.08	0.72	1.34	2.56	16.4	10	26.4	7.1	33.7	36.1	12.5	25.7	51.5	0.83	1150.2	5.617	5.596
0	1	50	0	87	33	23	46	4.50	5.23	1.61	1.40	3.37	21.4	12.8	34.1	9.2	43.6	46.4	14.4	23.7	61.7	0.9	1372.5	6.505	6.921
0	1	49	0	79	22	25	21	4.19	5.79	1.20	2.01	3.77	21.9	12.5	34.4	9.5	44.2	47.2	12.9	21.5	43.9	0.83	1389.5	7.125	7.229
0	0	44	0	75.5	21	25	15	5.76	4.80	0.82	1.73	2.74	16.2	9.9	26.1	7	33.3	35.6	14.4	28.8	61.4	0.82	1139.5	5.104	5.693
0	1	71	1	94	40	32	22	5.12	3.10	1.44	1.09	1.50	23.1	15.1	38.1	10	48.4	51.8	12.2	19	62.3	0.84	1489.1	4.117	7.46
0	0	39	0	72	8	12	14	4.88	3.77	1.05	1.52	2.07	16.4	10.3	26.8	7.1	34.1	36.5	15.3	29.6	69.3	0.87	1158	4.453	5.596
0	0	35	0	82	16	15	15	5.23	4.88	0.88	1.38	3.29	19.9	12.1	32	8.6	40.9	43.9	19.2	30.5	84.8	0.89	1317.6	5.086	6.46
0	1	65	0	90	33	28	14	4.74	4.37	0.74	1.47	2.70	24.8	15.3	40.2	10.7	51.2	54.5	18.8	25.6	86.2	0.93	1547.4	5.884	7.739
0	0	57	0	69	21	24	13	5.50	5.19	1.38	1.05	3.68	15.3	9.4	24.7	6.6	31.5	33.7	11	24.7	47.2	0.82	1097.3	5.628	5.292
0	0	36	0	61.5	13	17	14	4.81	5.50	1.48	2.11	3.04	16.7	10.3	26.9	7.2	34.3	36.7	11	23.1	45.1	0.83	1162.7	5.07	5.68
0	0	37	0	82.5	17	16	13	4.69	4.27	0.73	1.37	2.70	17.7	10.7	28.4	7.7	36.3	38.8	20.6	34.7	96.3	0.9	1208.3	5.637	6.062
0	0	32	0	69	18	16	11	4.14	6.16	0.94	1.85	3.98	18.2	11	29.2	7.9	37.3	39.9	15.7	28.2	66.8	0.85	1232.3	5.379	6.264
0	1	47	0	85	26	12	30	5.44	5.03	1.41	1.37	3.18	22.3	13	35.3	9.6	45.2	48.3	11.2	18.9	37.9	0.83	1412.6	6.827	7.332
0	0	36	0	73.5	9	19	8	3.67	4.53	0.42	2.03	2.46	20	12.4	32.4	8.6	41.2	44.2	19.2	30.3	82.2	0.84	1324.8	5.023	6.799
0	0	48	0	77	12	15	12	4.74	5.29	0.60	2.01	3.06	17.9	11.2	29.1	7.7	37	39.6	21	34.7	103.1	0.97	1224.7	4.711	5.859
0	0	38	0	79	11	11	10	5.64	5.04	0.71	1.41	3.31	20.6	12.6	33.3	8.9	42.4	45.4	15.9	25.9	68	0.86	1350.6	5.181	6.752
0	0	34	0	61.5	14	13	19	4.38	3.68	0.53	1.89	1.70	17.5	10.7	28.1	7.6	35.9	38.5	10.5	21.5	37.1	0.77	1200.7	5.527	6.16
0	0	52	0	72	13	21	7	4.99	4.06	1.11	1.79	1.87	17.8	11.1	29	7.7	36.9	39.4	19.8	33.5	92.2	0.89	1220.7	5.261	6.258
0	1	35	0	85	24	21	26	4.58	5.90	0.99	1.37	4.40	24.2	14.3	38.5	10.5	49.3	52.6	17.8	25.3	73.4	0.89	1505.9	6.607	7.395
0	0	40	0	71	5	11	8	4.83	5.72	0.89	1.53	3.99	17	10.7	27.7	7.4	35.3	37.8	22	36.8	104.3	0.93	1186	4.784	5.763
0	1	50	0	87	111	54	25	4.89	5.08	0.78	1.63	3.33	23.3	14.2	37.5	10.1	47.8	50.9	16	23.9	70.3	0.9	1470.3	5.9	7.296
0	0	30	0	71.5	19	19	26	4.44	4.13	0.66	1.68	2.44	17.5	10.8	28.2	7.5	36	38.6	14.2	27	61	0.84	1203	5.217	5.92
0	1	61	0	90	15	17	25	4.56	4.96	0.69	1.94	2.91	25.5	15.6	41.1	11	52.4	55.8	16.8	23.1	79.9	0.96	1576.3	5.908	7.429
0	0	45	0	80	25	23	18	4.62	5.69	0.80	1.68	3.79	17.8	10.6	28.5	7.7	36.4	39	19.6	33.5	90.1	0.88	1211.5	5.882	6.002
0	1	42	0	83	14	16	20	5.37	4.40	1.31	1.13	3.08	24.8	14.5	39.3	10.7	50.2	53.4	19.3	26.5	85.3	0.95	1523.4	6.783	7.593
0	0	34	0	68.5	7	10	9	4.98	3.53	1.07	1.69	1.72	18.7	11.3	30	8.1	38.3	40.9	16	28.1	66.1	0.83	1254	5.624	6.355
0	0	60	0	76.5	12	13	12	4.67	5.14	0.77	2.11	2.88	16.2	10	26.2	7	33.4	35.8	19.5	35.3	94.5	0.89	1142.6	4.987	5.632
0	0	41	0	73.5	10	11	8	5.05	4.72	0.64	1.89	2.73	18.8	11.6	30.5	8.1	38.8	41.6	18.6	30.9	83.2	0.87	1269.1	5.124	6.334
0	1	39	0	72	11	13	18	5.21	5.56	0.71	2.23	3.18	25.6	15.3	40.9	11.1	52.3	55.8	10.3	15.6	42.6	0.82	1575.4	6.014	7.786
0	0	41	0	65	13	14	15	4.45	4.88	1.04	1.76	2.76	17.8	10.8	28.6	7.7	36.5	38.9	10.9	21.8	41.1	0.8	1211.3	5.857	6.286
0	0	30	0	70	11	12	11	5.06	3.72	0.64	1.64	1.99	21.1	13	34	9.1	43.4	46.5	21.9	32	93.8	0.85	1375	5.091	7.022
0	1	41	1	85	16	30	23	5.02	4.10	1.15	1.31	2.02	27.2	16.2	43.4	11.8	55.5	59.3	14.1	19.2	59	0.87	1650.6	6.186	8.033
0	1	40	0	82	14	15	23	5.12	4.07	2.04	1.03	2.42	20.3	12	32.3	8.8	41.4	44.1	17.3	28.1	73.7	0.89	1323.2	6.423	6.685
0	1	29	0	83	50	27	24	4.46	5.65	0.98	1.73	3.61	25.8	15.3	41.1	11.1	52.5	56.3	13.5	19.4	49.6	0.84	1585.9	6.2	7.56
0	0	68	0	77	31	22	20	6.25	5.15	2.40	1.21	2.98	17.3	10.8	28.1	7.5	35.8	38.3	13.7	26.4	60.8	0.86	1196.3	4.82	5.927
0	0	23	0	63.5	8	13	11	4.26	6.10	0.55	1.90	4.12	16.5	10.3	26.8	7.1	34.1	36.5	16.7	31.3	74.2	0.85	1159	5.207	5.732
0	1	46	0	77	16	21	8	4.84	4.98	0.97	1.68	3.10	24.1	14.4	38.4	10.4	49.1	52.2	10.3	16.5	39.4	0.87	1497.4	6.534	7.864
0	0	43	0	74	10	14	10	4.94	3.54	1.70	0.96	2.02	18.2	11.4	29.6	7.9	37.7	40.3	15.5	27.8	69.6	0.88	1240	4.881	6.153
0	1	31	0	81	19	16	14	4.88	4.60	1.24	1.59	2.76	27.2	15.8	43	11.8	55	58.7	17.8	23.3	75.5	0.91	1637.7	7.076	8.044
0	1	45	0	74	18	22	15	4.04	6.02	1.21	1.82	3.94	20.1	12.1	32.2	8.7	41.2	43.9	6.5	13	18.9	0.78	1317.4	6.399	6.7
0	1	39	0	82	26	23	16	5.22	5.31	0.77	1.69	3.44	27.4	16.4	43.8	11.8	55.9	59.7	12.9	17.8	50.3	0.84	1659	5.95	8.401
0	0	46	0	67	9	14	11	5.28	5.17	1.32	1.26	3.35	15.4	9.7	25.1	6.7	32	34.3	14.7	30	66.8	0.85	1110.4	4.584	5.404
0	0	35	0	70	8	15	8	4.31	4.91	0.81	1.59	3.04	18.4	11.2	29.5	7.9	37.7	40.4	13.3	24.9	51.9	0.8	1241.7	5.286	6.414
0	0	29	0	70	14	19	10	4.62	5.37	1.27	1.40	3.57	18.9	11.5	30.3	8.2	38.7	41.5	17.4	29.5	74.9	0.86	1266.6	5.049	6.266
0	0	26	0	67	10	13	14	4.55	5.29	0.61	1.63	3.62	18.5	11.1	29.6	8	37.8	40.6	12.6	23.6	49.4	0.83	1247.8	5.156	5.994
0	1	36	0	85	9	11	25	4.63	6.27	2.12	1.56	3.91	26.2	15.5	41.7	11.3	53.4	57.3	10.7	15.8	43.8	0.85	1607.1	6.401	7.272
0	1	41	0	85	38	17	35	4.30	4.45	0.88	1.20	3.09	24.5	14.5	39	10.6	49.9	53.1	17.3	24.5	76.5	0.92	1517.9	6.525	7.58
0	0	44	0	70	10	12	11	5.74	5.31	0.99	1.26	3.60	17.9	11.3	29.2	7.7	37.2	39.7	18	31.2	82.5	0.87	1227.5	5.229	6.205
0	0	49	0	74	11	18	14	4.92	6.74	1.56	1.51	4.87	16.4	9.9	26.3	7.1	33.6	35.9	16.5	31.5	78.7	0.86	1145.1	5.714	5.908
0	0	63	0	80	23	19	29	4.78	4.91	3.07	1.08	2.16	18.4	11.5	29.9	7.9	38	40.5	16.4	28.9	77.6	0.88	1244.3	5.481	6.54
0	0	72	0	80.5	16	17	32	6.92	4.31	1.14	1.26	2.74	17.5	11	28.5	7.5	36.2	38.8	19.8	33.9	96.1	0.92	1207.1	4.637	6.013
0	0	78	0	73.5	13	16	14	4.81	4.88	0.72	2.14	2.40	19	12.2	31.2	8.2	39.7	42.4	12.1	22.1	52	0.82	1286.6	4.377	6.566
0	1	58	0	79	23	38	47	4.69	4.97	1.45	1.82	2.78	20.5	12.7	33.2	8.8	42.2	45.1	13.6	23.2	56.5	0.84	1343.5	5.808	6.823
0	0	31	0	64.5	11	9	28	5.35	3.45	0.63	1.32	1.92	16.6	10.6	27.2	7.2	34.6	37	13.3	26.4	58.2	0.85	1169.9	4.367	5.678
0	0	39	0	66.5	9	12	8	4.98	4.35	0.65	1.51	2.55	16.4	10.1	26.5	7.1	33.8	36.1	14.1	28	62.5	0.83	1150.7	5.651	5.74
0	1	27	0	81	18	18	15	4.61	4.45	1.25	1.45	2.65	23.4	14	37.4	10.1	47.7	51	15.2	22.9	65.9	0.9	1472.2	6.146	7.007
0	1	31	0	83	33	20	22	5.18	4.10	1.35	1.05	2.54	22.6	13.7	36.3	9.8	46.3	49.4	16.7	25.3	74.1	0.92	1436.5	5.818	6.904
0	1	46	0	95	39	25	154	4.73	4.63	2.94	0.99	2.55	28.5	17.2	45.7	12.3	58.4	62.3	15.3	19.7	70.3	0.92	1716.3	6.436	8.071
0	0	38	0	76	13	15	10	4.82	4.63	0.79	1.80	2.65	20.2	12.4	32.6	8.7	41.5	44.4	19	30	85	0.89	1328.9	5.217	6.657
0	1	42	0	92	40	28	113	4.81	4.85	3.53	0.86	2.64	24.3	14.5	38.8	10.5	49.5	53	20.5	27.9	91.8	0.95	1514.2	5.855	7.204
0	0	52	0	85	14	14	15	5.60	5.76	1.53	1.22	4.31	18.9	11.9	30.8	8.2	39.2	42	19.1	31.3	86.9	0.87	1276.3	4.569	6.492
0	1	41	0	88	28	21	51	4.71	5.02	2.23	0.81	3.57	22.1	13.3	35.4	9.6	45.3	48.4	19.7	29	84.3	0.9	1414.5	6.237	7.043
0	1	23	0	80	21	17	37	4.56	4.66	1.83	1.27	2.82	28.6	17	45.6	12.4	58.3	62.1	10.4	14.3	47.5	0.89	1711.7	6.558	8.114
0	1	40	0	87	24	18	16	4.98	4.33	1.13	1.46	2.69	24.1	14.3	38.3	10.4	49	52.1	15.1	22.5	64.8	0.9	1494.4	6.598	7.583
0	0	50	0	68	18	23	24	4.40	4.56	1.08	1.92	2.15	16.2	10	26.2	7	33.4	35.8	11.8	24.9	50.6	0.84	1142.3	5.36	5.524
0	1	56	0	87	18	18	21	4.88	5.74	1.02	1.21	4.17	26.1	15.4	41.5	11.3	53	56.4	14.1	19.9	61.5	0.91	1589.2	6.796	7.877
0	0	48	0	76	8	15	14	5.47	5.32	0.96	2.10	3.19	17.4	10.7	28.2	7.5	35.9	38.3	19	33.1	91.7	0.9	1198.2	5.33	6.023
0	0	29	0	75	10	15	10	4.40	5.34	1.31	1.36	3.64	17.3	10.7	28	7.5	35.7	38.3	19.5	33.8	86.5	0.84	1196.9	5.008	6.081
0	0	61	1	83	13	21	18	5.27	6.65	1.46	1.54	4.75	21.3	13.4	34.7	9.2	44.2	47.3	18	27.6	85.2	0.92	1390.8	5.203	6.817
0	1	44	0	85	18	21	49	6.05	5.26	1.20	1.62	3.27	22	13.5	35.5	9.5	45.2	48.3	15.1	23.8	68.3	0.92	1414.1	5.611	6.683
0	0	42	0	71	16	25	11	4.85	4.97	0.70	1.65	3.19	18.4	11.2	29.6	8	37.7	40.2	15.5	27.8	70.8	0.89	1238.1	5.803	6.263
0	0	60	0	68	16	20	29	5.66	6.35	1.19	1.55	4.66	16.4	10.2	26.6	7.1	33.9	36.1	10.7	22.9	47.1	0.83	1149.4	5.649	5.894
0	0	42	0	64	15	22	11	5.25	4.95	1.59	2.08	2.51	15.3	9.2	24.5	6.6	31.3	33.4	12.4	27.1	52.8	0.83	1091.3	6.061	5.495
0	1	56	0	83	16	13	21	5.92	6.12	0.74	1.95	3.90	24.2	14.6	38.9	10.5	49.6	53	13.1	19.9	52.7	0.87	1514.1	5.693	7.75
0	0	55	0	82	13	13	16	5.75	6.83	2.55	1.22	4.51	17.8	10.7	28.5	7.7	36.4	38.8	21.1	35.2	105.4	0.95	1208.2	6.273	5.966
0	0	27	0	60.5	10	16	17	4.49	4.97	0.98	1.95	2.67	12.4	7.8	20.3	5.4	25.8	27.7	12.2	30.6	53.6	0.82	967.9	4.317	4.362
0	0	25	0	65	12	13	13	5.57	5.24	0.59	1.60	3.36	20.1	12.6	32.7	8.7	41.7	44.6	12.5	21.9	53.4	0.83	1333	5.538	6.618
0	1	41	0	79	21	18	18	4.91	5.64	0.99	1.69	3.59	22.7	13.5	36.2	9.8	46.3	49.5	12	19.5	43.5	0.84	1440	6.462	7.175
0	0	37	0	78	29	22	19	5.13	5.74	1.30	1.93	3.63	18.2	11.2	29.5	7.9	37.6	40.2	20.8	34.2	98.2	0.91	1237.6	5.576	6.154
0	1	48	0	76	20	19	16	4.84	8.13	0.83	2.06	5.73	25.3	15	40.3	11	51.6	55.1	12.3	18.2	48	0.84	1561.1	6.589	7.627
0	0	43	0	70	8	13	10	4.43	5.06	0.54	1.51	3.22	16.6	10.4	27	7.2	34.3	36.6	18.8	33.9	89.2	0.88	1161.5	5.036	5.922
0	0	33	0	67	35	18	12	4.61	4.00	0.71	1.13	2.61	18.3	11.3	29.6	7.9	37.8	40.4	16.8	29.3	72.5	0.86	1243	5.195	6.21
0	1	34	0	75	45	25	19	4.76	3.41	1.09	0.66	2.23	18.9	11.7	30.6	8.2	39	41.6	13.7	24.8	60	0.88	1268.3	5.288	6.339
0	1	31	0	70	15	14	18	4.45	3.79	0.82	1.12	2.40	25	15.3	40.3	10.8	51.4	54.7	6.6	10.8	31.8	0.88	1550.9	5.915	7.521
0	0	45	0	65	20	23	19	5.01	4.49	0.86	2.00	2.24	14.6	9.2	23.8	6.3	30.3	32.3	12.2	27.4	53.5	0.85	1068	5.038	5.185
0	0	27	0	68.5	16	21	11	4.50	3.87	0.90	1.11	2.43	17.5	10.8	28.3	7.6	36.1	38.6	14.9	27.8	65.4	0.86	1204	4.995	5.99
0	0	71	0	57	23	24	19	5.39	3.91	0.64	2.26	1.55	13.8	8.9	22.7	6	28.9	30.9	6.9	18.3	23.2	0.77	1037.1	3.915	5.039
0	0	27	0	65	8	16	10	4.39	4.77	0.83	1.95	2.73	16.6	10.5	27.1	7.2	34.4	36.9	13.7	27.1	61.8	0.88	1166.5	4.245	5.543
0	1	42	0	84	24	18	38	5.07	6.26	2.09	1.34	4.50	19.5	11.4	30.9	8.4	39.5	42.1	15.5	26.9	63	0.87	1279.6	6.517	6.641
0	0	77	1	68	15	22	7	5.63	3.75	0.70	1.82	1.87	14.9	9.8	24.6	6.4	31.2	33.5	7.3	17.9	30.3	0.79	1093.4	4.242	5.113
0	1	30	0	88	26	20	56	4.35	4.55	0.68	1.46	3.08	23.3	14	37.3	10.1	47.7	51	16.3	24.2	68.4	0.88	1471.5	6.074	7.227
0	1	62	0	88	22	23	21	4.68	5.68	4.86	0.78	2.87	21.4	13.1	34.5	9.3	44	46.7	11.1	19.2	48.4	0.89	1378.8	6.429	7.043
0	1	51	0	95	17	19	31	5.65	5.42	1.51	1.38	3.39	28.1	16.9	45	12.1	57.4	61.2	13.3	17.8	59.4	0.93	1692.6	6.041	8.259
0	0	51	0	82	18	17	18	5.35	2.95	0.60	1.06	1.73	23.5	14.4	37.9	10.1	48.3	51.7	20	28	93.2	0.93	1485.7	5.509	7.348
0	0	32	0	66.5	10	14	6	4.72	4.12	0.70	1.29	2.52	16.4	10.2	26.6	7.1	33.9	36.2	13.1	26.6	58.7	0.84	1151.8	5.064	5.765
0	0	45	0	82	13	15	9	5.03	4.84	0.81	1.44	3.10	21.6	13	34.6	9.3	44.2	47.2	12.2	20.6	50	0.84	1389.4	6.1	6.874
0	0	28	0	69	13	16	24	4.95	5.11	0.60	1.65	3.25	17.8	11.1	28.9	7.7	36.8	39.4	14.2	26.4	64.3	0.89	1222.1	4.997	5.77
0	1	34	0	74	16	11	23	22.38	6.17	2.13	1.66	3.96	23.7	14.3	38	10.3	48.6	52	6.4	11	19.8	0.82	1492.6	5.409	7.195
0	0	34	0	73	11	13	13	4.75	6.62	1.26	1.53	4.68	19.5	11.5	31	8.4	39.6	42.4	13.9	24.8	58	0.85	1285	6.262	6.393
0	0	32	0	72	10	14	12	4.97	3.82	1.00	1.45	2.21	16.7	10.1	26.8	7.2	34.2	36.6	16.6	31.2	72.5	0.86	1161.2	5.503	5.654
0	1	60	0	87	45	32	257	7.52	5.05	2.16	1.07	3.32	20	12.4	32.5	8.7	41.4	44.1	16.7	27.5	78.7	0.95	1321.6	5.561	6.447
0	1	74	0	79	18	21	31	5.27	4.18	1.37	1.70	2.10	21.6	13.8	35.4	9.3	44.9	47.9	11.8	19.7	54.9	0.89	1405.6	4.371	6.914
0	0	33	0	71.5	11	15	9	4.84	3.14	0.93	1.04	1.70	17.3	10.7	28	7.5	35.7	38.2	15.3	28.6	71.5	0.9	1194.5	5.029	5.727
0	0	57	1	78	15	17	9	5.00	2.77	1.49	0.99	0.97	17.1	10.5	27.6	7.4	35.1	37.5	15.7	29.6	74.2	0.9	1179	5.579	5.875
0	0	54	0	61	21	19	12	4.93	4.93	1.06	2.11	2.51	15.5	9.7	25.2	6.7	32.1	34.3	7.4	17.8	27.3	0.8	1110.5	5.214	5.566
0	1	52	0	84	18	15	37	5.65	4.35	1.47	1.05	2.84	25.2	15.1	40.3	10.9	51.4	54.9	13.4	19.6	54.3	0.87	1556.1	6.024	7.667
0	0	33	0	65	14	16	12	4.94	4.62	0.69	1.56	2.99	16.9	10.5	27.4	7.3	34.9	37.3	13.8	27	59.9	0.84	1175.2	5.153	5.942
0	1	49	0	87	26	20	18	5.41	5.83	1.27	1.68	3.76	24.6	15.2	39.8	10.6	50.7	53.9	18.3	25.3	84.7	0.94	1535	5.585	7.791
0	0	53	1	72	19	18	10	4.48	4.62	1.72	1.34	2.53	16.9	10.5	27.5	7.3	35	37.4	16.1	30	73	0.86	1178.6	5.207	5.876
0	0	42	0	72	7	12	3	4.67	5.58	1.03	1.33	3.83	17.1	10.9	28	7.4	35.6	38.1	17.3	31.2	81.3	0.88	1193.3	4.353	5.956
0	0	51	0	72	12	16	28	4.85	4.79	1.54	1.33	3.14	16.4	10	26.3	7.1	33.6	35.9	16.3	31.2	72.3	0.85	1145.9	5.27	5.828
0	1	24	0	85	21	28	19	4.66	5.11	0.86	1.81	3.09	29	17	46	12.5	58.9	62.8	11.6	15.6	51.3	0.86	1726.5	6.948	8.221
1	1	55	0	89	15	13	21	9.06	4.91	1.71	1.39	3.13	27.2	16.5	43.7	11.8	55.8	59.4	12.6	17.5	60.8	0.92	1652.4	5.943	7.946
1	1	43	0	81	20	18	20	4.45	5.78	1.53	1.27	4.48	24.7	14.6	39.3	10.7	50.2	53.5	15.9	22.9	65.9	0.9	1526.5	6.436	7.788
1	0	43	0	86	16	16	13	4.92	5.55	3.47	0.95	3.21	18.8	11.8	30.6	8.1	39	41.6	23.3	35.9	114.3	0.95	1268.6	5.252	6.388
1	0	56	0	80	21	14	40	5.47	5.61	1.85	1.09	4.00	19.9	12	31.9	8.6	40.7	43.4	17.4	28.6	79.8	0.89	1307.1	6.144	6.846
1	1	38	0	92	17	14	22	4.53	5.86	1.92	1.06	4.40	27.6	16.7	44.2	11.9	56.5	60.1	18.1	23.1	85	0.95	1668.5	6.149	7.989
1	0	34	0	77	15	13	14	5.01	4.59	1.39	1.06	2.87	17.6	10.6	28.2	7.6	36	38.4	17	30.7	76.5	0.88	1199.3	5.589	6.138
1	1	35	0	85	42	30	27	5.17	4.73	1.26	1.29	2.98	23	13.7	36.7	9.9	46.9	49.9	16.1	24.4	66.4	0.88	1448.3	6.401	7.536
1	0	58	0	87	25	22	34	5.65	6.70	2.21	1.44	4.23	19.4	12.1	31.6	8.4	40.2	43	19.9	31.6	92.3	0.89	1299.1	5.128	6.59
1	0	50	0	76	25	20	11	5.18	6.02	1.95	1.38	4.07	18.4	11.4	29.8	7.9	38	40.6	18.8	31.6	83.2	0.86	1247.2	5.051	6.43
1	1	33	0	82	32	20	22	4.79	6.01	1.13	1.55	4.33	23.8	14.4	38.2	10.3	48.8	52	18.8	26.5	85.1	0.95	1494	5.972	7.241
1	0	35	0	76	27	21	23	4.66	5.05	1.56	1.37	3.41	15.9	9.4	25.2	6.9	32.3	34.4	16.8	32.7	80.5	0.88	1114	6.223	5.51
1	0	44	0	79	17	14	16	5.59	5.51	0.80	2.00	3.50	18.5	11.3	29.8	8	38	40.5	20.3	33.3	95.3	0.92	1245.4	5.723	6.344
1	1	50	0	80	16	17	55	10.48	5.62	6.51	1.06	2.50	20.7	12.3	32.9	8.9	42.1	44.9	13	22.5	53.5	0.88	1339	6.542	6.623
1	0	46	0	80	11	18	17	5.19	5.02	1.15	1.39	3.30	20.1	12.1	32.1	8.7	41	43.9	20.4	31.8	93.4	0.92	1317.3	5.754	6.522
1	0	52	0	68	11	14	17	5.47	6.43	2.01	1.64	4.08	14.5	9	23.5	6.3	29.9	31.9	16.1	33.4	77.7	0.87	1060.1	5.223	5.194
1	1	42	0	82	25	21	22	4.82	6.47	1.26	1.37	4.85	24	13.8	37.8	10.4	48.4	51.6	14.1	21.5	56.2	0.88	1483.5	7.629	7.48
1	1	52	0	92	24	18	29	4.59	4.85	3.66	0.90	3.08	27.9	16.2	44.1	12.1	56.5	60.4	20.4	25.2	89.3	0.93	1675.1	6.731	7.827
1	1	55	0	84	20	18	46	5.85	4.92	0.96	1.22	3.50	22.1	13.2	35.2	9.5	45	48	14.4	23.2	59.4	0.87	1405.8	6.274	7.253
1	1	55	0	91	34	23	43	4.94	5.99	2.16	1.18	4.51	23.9	14	37.9	10.3	48.5	51.7	17.7	25.5	73.7	0.89	1487.1	7.032	7.674
1	1	56	0	84	37	32	120	5.30	5.61	2.14	1.31	3.44	23.8	13.9	37.7	10.3	48.2	51.3	16.1	23.9	64.8	0.87	1478	6.848	7.8
1	1	52	0	90	18	14	21	7.93	3.58	1.61	1.12	1.99	24.3	15.1	39.3	10.5	50.1	53.3	17.3	24.5	80	0.94	1521.1	5.295	7.815
1	1	53	1	90	16	15	64	4.69	4.42	5.47	0.78	1.90	26	15.7	41.6	11.2	53.1	56.6	16.9	23	77.4	0.94	1592	6.182	7.77
1	1	56	0	87	22	18	39	5.21	6.02	2.00	1.17	4.35	24	14.6	38.6	10.4	49.2	52.4	16	23.5	72.7	0.92	1500.9	6.234	7.47
1	0	53	0	72	27	18	19	6.14	4.91	1.56	1.34	3.08	17	10.6	27.6	7.4	35.1	37.6	17.7000007629395	32	80	0.87	1182.5	4.813	5.896
1	1	46	0	85	20	17	59	5.17	7.15	4.76	1.04	4.14	23.2	13.5	36.7	10	47	50	12.9	20.5	49.2	0.87	1450.3	6.899	7.565
1	0	75	0	75	11	17	14	5.59	5.07	1.27	1.51	3.01	17.1	11	28	7.4	35.6	38.1	16.8	30.6	80.9	0.89	1192.9	4.433	5.958
1	1	47	0	82	19	18	30	5.01	5.55	1.96	1.07	3.89	24.4	14.8	39.2	10.6	50.1	53.4	16.3	23.3	74.5	0.92	1524.2	6.16	7.114
1	1	44	0	81.5	20	16	26	8.89	4.66	1.87	1.08	2.96	20.8	12.6	33.4	9	42.6	45.5	12.6	21.7	51.1	0.86	1352.3	6.079	6.818
1	0	66	1	82	21	25	23	5.08	7.26	1.48	1.94	4.96	18.1	11.2	29.3	7.8	37.4	39.9	15.1	27.4	66.8	0.86	1232.7	5.6	6.198
1	1	51	0	90	23	21	27	4.77	6.79	2.65	1.10	4.92	25.1	14.9	40	10.9	51.2	54.6	17	23.8	75.9	0.93	1549.2	6.54	7.39
1	1	52	0	87	21	14	19	5.60	4.52	3.49	1.24	2.08	27.6	16.5	44.1	11.9	56.3	60	15.7	20.8	71.4	0.94	1665.2	6.557	8.132
1	1	46	0	85	32	25	28	4.44	5.63	2.86	0.93	3.58	28.9	17.1	46	12.5	58.8	62.7	15.1	19.4	65.1	0.88	1725.1	6.834	8.314
1	1	36	0	87	38	20	31	4.35	6.49	2.09	1.24	4.39	27.3	16.4	43.6	11.8	55.7	59.5	19.3	24.5	90.2	0.96	1654.3	6.309	7.685
1	1	42	0	98	18	19	48	5.66	4.16	1.55	1.06	2.69	25	15.4	40.4	10.8	51.6	55	27.5	33.3	127.2	1	1558.1	5.84	7.413
1	1	47	0	88	55	42	158	5.63	5.04	1.71	1.19	3.29	22.7	13.7	36.3	9.8	46.4	49.5	19.1	27.8	83.7	0.91	1439.6	6.167	7.137
1	0	48	0	82	25	21	30	5.73	5.13	1.38	1.31	3.46	19.4	11.6	31	8.4	39.6	42.2	19.5	31.5	86.3	0.87	1282.5	5.689	6.736
1	0	51	1	74	20	19	25	6.95	6.08	2.19	1.81	3.59	16.5	10	26.5	7.1	33.8	36.1	19	34.5	91.4	0.89	1149.1	5.72	5.827
1	1	47	0	89	43	39	34	5.02	6.19	3.92	1.22	3.57	26.2	15.6	41.8	11.3	53.4	56.9	16.4	22.4	69	0.89	1598.9	6.586	8.053
1	1	64	1	86.5	22	24	100	5.49	5.04	3.24	1.40	2.35	21.2	12.9	34.1	9.1	43.4	46.3	19.9	30.1	90.6	0.92	1370.2	5.686	6.969
1	0	51	0	79	14	18	16	4.81	6.27	0.91	2.02	3.92	17.4	10.6	28	7.5	35.7	38.1	19.1	33.3	89	0.88	1193.7	5.431	6.087
1	1	29	0	71	21	13	17	4.89	4.10	1.20	1.18	2.63	21.2	13.1	34.2	9.1	43.6	46.7	6.3	11.8	22.4	0.79	1379.3	5.451	6.523
1	1	57	0	74	18	13	17	5.19	4.94	0.80	1.22	3.43	19.7	12.2	31.9	8.5	40.7	43.3	8.5	16.4	29.3	0.82	1305.7	5.652	6.803
1	1	36	0	80	21	16	28	7.27	4.31	3.13	0.78	2.87	25.4	15.2	40.6	11	51.9	55.4	10.4	15.8	40.1	0.83	1567.2	6.075	7.629
1	1	58	1	80	20	22	112	4.27	4.83	2.22	1.08	3.09	23.3	14.3	37.6	10.1	47.9	51	10.8	17.5	44.2	0.87	1471.3	5.619	7.555
1	1	60	1	92	11	14	22	4.53	4.84	3.76	0.98	2.35	26.3	16.1	42.5	11.4	54.1	57.8	15.6	21.3	66.9	0.88	1618.3	5.72	8.088
1	1	37	1	87	44	35	46	5.60	6.45	2.58	1.27	4.34	24.9	14.3	39.1	10.7	50.2	53.5	15.6	22.6	62.5	0.89	1525.3	7.252	7.679
1	1	29	0	89	29	18	17	4.77	4.20	1.26	0.97	2.89	25.5	15.8	41.3	11	52.6	56.1	20.3	26.5	96.9	0.98	1582.6	5.652	7.396
1	1	63	0	84	20	25	17	4.96	5.15	1.89	1.00	3.48	22.7	13.8	36.5	9.8	46.6	49.8	15.3	23.6	63.5	0.85	1445	6.016	7.342
1	1	61	1	86	17	17	33	7.29	3.21	2.61	0.76	1.85	23.7	14.3	38	10.3	48.5	51.8	16	23.7	70	0.93	1488	5.933	7.434
1	1	62	0	79.5	14	16	28	5.32	6.08	2.30	1.28	4.05	22.6	13.7	36.3	9.8	46.3	49.3	18.2	27	80.4	0.92	1433.8	6.134	7.251
1	1	48	0	87	29	20	65	5.58	5.95	4.41	0.99	3.25	23.9	14.5	38.5	10.3	49.1	52.2	16.4	23.8	75.6	0.93	1498.4	5.993	7.285
1	1	26	0	80	26	23	17	4.01	4.59	1.13	1.10	3.14	21.1	12.7	33.8	9.1	43.2	46.1	14.4	23.8	58.1	0.86	1365.1	6.151	6.806
1	1	36	0	84	30	32	57	5.09	5.57	1.98	1.22	3.97	24.4	14.3	38.7	10.5	49.5	52.9	16	23.3	63.4	0.87	1511.6	6.477	7.592
1	1	30	0	83	16	13	8	4.75	4.23	0.98	1.10	2.81	29.4	17.6	46.9	12.7	60	64	12.7	16.6	58.8	0.92	1752.1	6.111	8.177
1	1	70	1	88	22	28	53	4.59	5.28	1.76	0.98	3.80	25.3	15.5	40.7	10.9	51.9	55.1	16.3	22.8	76.9	0.95	1561.1	5.69	7.9
1	1	60	0	92	23	14	35	5.31	5.88	2.77	1.29	3.65	26.2	16.3	42.4	11.3	54	57.6	17	22.8	79.8	0.94	1613.9	5.631	7.924
1	1	60	0	83	81	35	100	5.45	3.80	2.78	1.14	1.54	20.5	12.8	33.3	8.9	42.4	45.2	17.8	28.3	81.7	0.92	1345.5	5.505	6.76
1	1	43	0	87	16	14	13	4.21	5.08	0.82	1.31	3.45	27	16.3	43.3	11.7	55.3	59.1	12.6	17.6	54.5	0.89	1645.7	6.447	8.007
1	0	57	0	82	30	25	12	4.62	3.22	1.06	1.55	1.35	20.3	12	32.2	8.8	41.3	44.2	16.8	27.6	69.2	0.85	1324.5	5.92	6.846
1	1	57	1	86	33	21	35	6.29	4.11	1.95	1.07	2.43	24	14.7	38.7	10.4	49.3	52.5	14	21	66.4	0.93	1504.9	6.085	7.125
1	1	58	1	83	20	12	27	5.52	4.53	1.12	1.24	2.90	22.3	13.7	36	9.6	45.9	48.8	13.7	22	62.4	0.91	1423.6	6.008	7.06
1	1	43	0	83	37	25	22	4.62	5.51	3.32	0.86	3.59	21.2	12.7	33.8	9.1	43.2	46.2	17.4	27.4	74.9	0.9	1367	6.053	6.7
1	1	37	0	81	23	20	28	4.44	3.50	3.50	0.84	1.46	25.3	15.3	40.7	10.9	51.9	55.3	14.1	20.4	61.8	0.89	1563.9	6.15	7.818
1	1	57	0	85	11	14	34	6.20	6.01	1.25	1.27	4.25	21.5	12.8	34.3	9.3	43.9	46.7	15.2	24.6	64.6	0.89	1378.3	6.317	7.042
1	1	63	0	91	18	15	30	4.90	4.50	1.17	1.22	2.72	26.6	16.3	42.9	11.5	54.7	58.4	16.6	22.2	74.4	0.91	1630.4	5.613	8.012
1	1	56	0	86	19	16	51	7.40	5.11	2.28	1.16	3.17	26.7	16.7	43.4	11.5	55.3	58.9	15.2	20.5	72.6	0.91	1641.9	5.305	8.068
1	0	65	0	76	58	42	41	7.52	3.31	1.29	1.42	1.44	19	11.7	30.7	8.2	39.1	41.8	17.5	29.6	80.9	0.91	1272	5.563	6.321
1	1	77	0	86	11	14	26	4.66	6.38	1.15	1.42	4.51	19.1	11.6	30.7	8.3	39.2	41.9	16.8	28.7	75.8	0.9	1274.5	5.461	6.548
1	1	32	0	91	47	29	30	6.05	6.33	2.55	1.05	4.80	22.5	13.4	35.9	9.7	45.9	49.1	24	32.8	104.1	0.94	1430.9	6.039	6.944
1	0	64	0	82	24	18	21	6.50	5.54	3.08	1.25	3.41	18.5	11.5	30	8	38.2	40.9	17.2	29.6	79.7	0.9	1253.1	5.262	6.12
1	1	36	0	89	26	16	22	4.31	4.30	1.13	1.09	2.95	29.5	17.5	47	12.7	60.1	64.2	17.7	21.6	75.4	0.9	1756.1	6.29	8.481
1	1	35	0	92	74	32	53	5.06	4.93	1.89	1.22	3.21	26.2	15.5	41.7	11.3	53.4	57.1	20	26	89.2	0.95	1602.4	6.364	7.396
1	1	24	0	83	20	17	22	5.85	5.10	0.66	1.54	3.35	26.7	15.8	42.5	11.5	54.4	58.1	15.6	21.2	63.3	0.87	1624.7	6.342	7.959
1	1	44	0	86	86	32	333	5.72	5.48	2.46	1.02	3.63	23.1	14	37.1	10	47.4	50.5	15.2	23.2	69.3	0.93	1460.4	6.056	6.982
1	0	50	0	76	58	28	41	4.81	5.87	1.54	1.45	4.01	17.7	10.8	28.5	7.6	36.3	38.8	17.3	30.8	77.9	0.86	1208.2	5.743	6.241
1	1	58	1	91	15	15	44	6.09	4.54	1.42	1.41	2.76	27.9	16.9	44.9	12.1	57.2	61	18.4	23.1	82	0.93	1688.5	5.684	8.418
1	0	42	0	73.5	18	16	25	9.63	4.82	2.99	1.41	2.61	17.1	10.6	27.7	7.4	35.3	37.8	20.2	34.8	90.9	0.85	1186.6	5.035	6.085
1	0	38	0	74.5	41	29	27	5.43	5.77	2.51	1.46	3.87	20.7	12.4	33.1	9	42.3	45.2	17	27.3	71.6	0.86	1346.2	6.198	6.939
1	1	57	0	97	34	29	60	6.19	4.92	4.58	0.75	2.66	23.6	14.7	38.3	10.2	48.8	52.2	21.2	28.9	96.9	0.96	1497.7	5.409	6.937
1	1	59	0	87	26	23	17	5.72	5.08	2.84	1.15	3.05	21.5	13.3	34.7	9.3	44.3	47.3	18.8	28.4	84.9	0.92	1392.1	5.55	6.802
1	1	53	0	82	27	18	77	4.73	4.31	1.43	1.52	2.34	19.7	12.1	31.8	8.5	40.5	43.2	17.6	28.9	78	0.89	1303.8	5.878	6.682
1	1	40	0	80.5	12	14	17	5.78	5.81	3.03	1.17	3.62	23	13.7	36.8	10	47	50.2	15.8	23.9	62.3	0.87	1454.2	6.115	7.298
1	0	58	0	74	33	25	32	5.70	4.86	1.93	1.22	2.83	16.4	10.4	26.8	7.1	34.1	36.5	18.4	33.6	86.8	0.89	1157.9	4.631	5.677
1	1	43	0	83	48	26	21	5.50	3.84	1.05	1.15	2.58	25.3	14.7	40	10.9	51.3	54.9	18.3	25	67.6	0.83	1555.5	6.3	7.781
1	1	60	1	78	19	20	23	4.55	5.39	2.60	0.91	3.64	21	12.8	33.8	9.1	43.1	45.8	16.9	26.9	75.3	0.89	1359.8	6.21	7.095
1	0	71	0	72.5	19	22	57	5.18	6.45	2.29	1.12	4.55	15.1	9.5	24.6	6.5	31.4	33.6	15.4	31.5	73.6	0.88	1094.7	4.488	5.27
1	0	61	1	79.5	29	17	69	5.34	6.92	2.15	1.61	4.52	17.8	11.1	28.9	7.7	36.7	39.2	20.8	34.7	101.5	0.94	1215.7	5.346	6.1
1	1	40	0	80	23	21	49	4.58	4.64	1.39	1.09	3.04	22.5	13.5	36	9.7	46	49.1	14.8	23.2	63.5	0.9	1430.4	6.073	7.044
1	1	61	1	79	19	18	20	5.56	4.22	1.10	1.23	2.83	24	14.3	38.3	10.4	48.9	52.1	9.7	15.7	30.2	0.79	1494.9	6.658	8.175
1	1	47	0	85	13	17	24	5.03	5.48	1.12	1.43	3.87	24	14.6	38.6	10.4	49.2	52.6	13.7	20.7	61.2	0.91	1505.8	5.689	7.148
1	1	70	1	79	31	28	19	5.21	3.13	0.72	1.16	1.76	24.6	15.1	39.7	10.7	50.6	53.8	10.5	16.3	42.3	0.83	1532.5	6.149	8.069
1	0	59	1	77.5	31	23	23	6.75	4.16	1.19	1.27	2.44	16.2	10.1	26.4	7	33.6	35.8	19.7	35.4	99	0.91	1144.1	5.261	5.654
1	1	56	0	87	16	15	35	9.73	6.46	4.00	1.18	4.01	22.1	13.5	35.6	9.6	45.4	48.4	20.9	30.2	95.2	0.96	1414.8	5.933	7.036
1	1	53	0	90	13	15	26	4.33	6.12	1.78	1.08	4.46	22.5	13.7	36.2	9.7	46.2	49.3	16.4	25	68.6	0.87	1434.6	5.556	7.344
1	0	55	0	78	22	24	19	4.90	6.18	1.41	1.53	4.37	17.8	11.2	29	7.7	36.9	39.4	17	30.2	90.8	0.96	1220.2	5.198	6.099
1	1	42	1	86	37	18	37	5.33	3.87	1.06	0.87	2.61	24.2	14.5	38.7	10.5	49.5	52.8	20.5	28	86.4	0.9	1510.5	5.887	7.706
1	1	62	0	85	10	13	31	5.78	4.99	1.92	0.99	3.43	24.7	14.8	39.5	10.7	50.4	53.8	14.4	21.2	61	0.89	1531.5	6.195	7.755
1	1	56	0	88	16	16	34	5.13	4.84	1.56	1.45	2.92	29.3	18	47.2	12.7	60.2	64.2	12.9	16.8	64.8	0.93	1756.3	6.09	8.281
1	1	37	0	87	36	19	71	5.23	5.75	1.95	1.04	4.00	26	15.7	41.7	11.3	53.3	56.9	18.2	24.3	83.8	0.94	1598.3	5.906	7.532
1	1	74	1	87	29	27	18	4.96	3.48	0.82	1.79	1.36	22.7	14.2	37	9.8	47.1	50.2	12.2	19.6	53	0.87	1453.3	5.864	7.568
1	1	62	1	87	28	24	307	4.82	5.47	1.86	1.86	3.06	20.5	12.3	32.8	8.9	42	44.8	18.8	29.6	85.4	0.92	1337.2	6.139	6.639
1	0	66	0	85.5	30	26	30	6.09	3.40	1.38	1.28	1.63	18.8	12.3	31.1	8.1	39.4	42.2	23.3	35.5	115.6	0.96	1282.3	4.252	6.125
1	0	55	1	71.5	15	25	13	4.80	4.04	1.34	1.31	2.25	16.2	10.1	26.3	7	33.5	35.7	18.6	34.2	87.6	0.88	1141.3	4.779	5.839
1	1	35	0	87	77	36	54	5.02	5.32	1.35	1.38	3.49	25	15	40	10.8	51.1	54.3	20.9	27.7	93	0.94	1543.7	6.443	7.856
1	1	46	0	87	55	39	81	4.82	4.40	1.63	1.48	2.41	27.7	16.2	43.9	11.9	56.2	59.9	16.2	21.3	73	0.91	1663.8	6.885	7.887
1	1	36	0	89	67	35	56	5.24	4.88	2.44	0.97	3.19	25	15.1	40.1	10.8	51.1	54.4	17.7	24.6	81	0.93	1544.8	6.169	7.636
1	1	51	0	96	33	35	156	6.89	5.57	12.21	0.91	1.67	28	16.9	45	12.1	57.4	61.4	21	25.5	100.6	0.99	1695.2	5.984	7.574
1	1	47	1	86	30	26	27	4.94	4.64	6.33	0.73	1.76	26	15.6	41.7	11.3	53.2	56.9	14.8	20.7	59.8	0.86	1598.4	6.109	8.02
1	1	39	0	79	15	16	21	4.53	4.48	1.32	0.99	3.10	18.5	11.3	29.8	8	38	40.5	14.8	26.8	62.6	0.87	1243.8	5.864	6.378
1	1	32	0	82	22	16	37	4.76	4.43	3.21	0.95	2.49	27.4	16.4	43.8	11.9	56	59.8	14.9	19.9	59.1	0.86	1662	6.314	8.195
1	1	27	0	78	17	16	11	4.22	3.77	1.78	1.05	2.27	27.6	15.9	43.5	11.9	55.8	59.5	12.5	17.3	44.8	0.84	1656	7.167	8.289
1	1	57	0	87	29	21	54	6.24	6.04	2.64	1.13	3.80	23.4	14.3	37.7	10.1	48.1	51.3	18.1	26	81.6	0.93	1479.1	5.747	7.174
1	0	46	0	86.4	13	13	12	5.07	4.22	0.76	1.40	2.59	18.7	11.1	29.7	8.1	38	40.6	20.6	33.6	95.3	0.87	1247.4	6.149	6.661
1	1	52	1	82	9	13	19	5.48	5.73	1.64	1.28	3.85	24.1	14.3	38.4	10.4	49.1	52.3	16.8	24.3	68.7	0.89	1499.4	6.074	7.804
1	1	52	0	89	11	13	17	4.43	5.40	1.96	1.15	3.68	25.9	15.7	41.6	11.2	53.1	56.7	18.8	24.9	84.5	0.95	1594.5	6.307	7.661
1	1	53	0	88	67	34	36	4.60	5.66	1.55	1.36	3.94	24.9	15.2	40.1	10.8	51.2	54.5	13.6	20	57.4	0.87	1546.4	6.436	7.874
1	0	42	0	78.5	17	21	26	5.83	4.66	3.93	1.26	2.40	20.4	12.4	32.8	8.8	41.9	44.7	17.4	28	78.2	0.88	1335.3	5.906	6.907
1	1	57	0	88	18	17	43	5.67	5.75	1.23	1.53	3.73	23.9	14.2	38.1	10.3	48.7	51.8	16.2	23.8	67.9	0.9	1489.4	6.677	7.671
1	1	42	1	86	44	27	51	4.36	5.52	3.00	1.05	3.00	23.1	13.7	36.8	10	47.1	50.2	16.3	24.5	68	0.9	1455.1	6.464	7.195
1	0	29	0	74.5	11	13	12	4.71	4.25	1.46	1.17	2.51	17.3	11	28.3	7.5	36	38.5	26.6	40.9	126.2	0.95	1200.8	4.584	5.885
1	1	42	0	83	20	21	61	4.32	4.33	2.73	1.11	2.21	21.6	13.1	34.7	9.3	44.3	47.3	15.6	24.9	66.9	0.87	1391	6.127	6.976
1	1	61	1	91	18	18	36	4.93	4.59	1.30	1.24	2.88	24.4	14.7	39.1	10.6	50	53.4	18.2	25.4	80.6	0.95	1523.9	5.912	7.191
1	1	53	0	79	10	12	16	5.24	3.50	0.73	1.42	1.75	22.3	13.4	35.7	9.6	45.5	48.5	14.1	22.5	59.3	0.87	1417.5	6.333	7.191
1	1	53	0	87	30	22	25	4.56	3.84	2.21	1.05	1.95	25	15.3	40.3	10.8	51.5	54.9	14.5	21	62.8	0.88	1555	5.688	7.74
1	0	60	0	75	23	24	19	5.12	5.34	1.75	1.49	3.55	19.3	11.7	31	8.3	39.5	42.3	14.8	26	61.9	0.82	1283.1	6.137	6.835
1	1	60	1	72.1	17	14	32	4.64	5.69	3.59	1.85	3.09	25.2	15.4	40.6	10.9	51.8	55.2	28.4	34	133.6	1.02	1562.7	5.567	7.804
1	1	52	1	91	17	21	49	4.40	5.06	3.67	1.30	2.55	22.5	13.6	36.2	9.7	46.2	49	16.1	24.7	72.4	0.92	1428.7	6.576	7.385
1	0	51	0	73.5	20	18	54	5.19	5.84	3.39	1.05	3.49	17	10.4	27.4	7.3	34.9	37.4	19	33.7	90.1	0.9	1177.4	5.498	5.741
1	1	54	1	88	34	24	28	5.62	2.90	1.35	0.92	1.45	23	14	37	9.9	47.2	50.3	15.6	23.7	68.8	0.92	1455.4	5.889	7.284
1	1	75	1	90	17	21	24	6.16	5.02	1.64	1.06	3.47	25.2	16.1	41.3	10.9	52.5	55.8	20.2	26.6	104.5	1.01	1575.4	5.146	7.546
1	1	42	0	89	17	13	27	5.00	4.99	0.90	1.39	3.43	26.3	15.2	41.5	11.4	53.1	56.7	17.8	23.8	70.6	0.89	1595.5	6.77	7.912
1	1	56	0	80	12	16	26	4.62	4.42	1.78	1.09	2.70	21.7	13.3	34.9	9.4	44.5	47.3	14.1	22.9	55.5	0.82	1392.1	5.618	7.847
1	1	73	1	94	25	23	17	5.26	2.81	0.81	1.06	1.56	20.1	12.4	32.5	8.7	41.4	44.2	21.4	32.7	97.7	0.91	1323.9	5.47	6.896
1	1	61	0	88	38	22	34	5.03	4.90	2.61	1.11	3.07	22.7	13.6	36.3	9.8	46.4	49.4	17.3	25.9	73.2	0.9	1437.2	6.145	7.303
1	1	56	0	86	14	16	30	5.02	5.85	1.21	1.83	3.51	26.2	15.5	41.7	11.3	53.3	56.8	13.8	19.5	54.5	0.88	1597.1	6.455	8.173
1	1	53	0	89	57	34	65	5.11	5.43	2.02	1.20	3.65	24.4	14.5	38.9	10.5	49.7	53	18	25.3	77	0.92	1515.1	6.465	7.371
1	1	46	0	87	24	23	21	4.97	4.59	1.68	0.81	3.30	26.6	16.1	42.7	11.5	54.5	58.2	16.1	21.6	66.5	0.86	1627.8	6.005	8.138
1	1	80	1	88	14	20	16	5.00	5.91	1.13	1.13	4.74	22.6	14.2	36.8	9.8	46.8	49.9	16.8	25.2	78.3	0.92	1447.6	4.887	7.153
1	0	38	0	75	15	15	23	4.64	5.35	3.13	0.94	3.28	18	11	29	7.8	37	39.5	17.2	30.3	78.7	0.89	1223.7	5.726	6.136
1	1	44	0	87	28	23	22	5.36	5.91	2.13	1.05	4.06	22.8	14	36.8	9.8	46.9	50	18.8	27.3	79.9	0.86	1450.5	6.104	7.565
1	1	58	1	84	10	20	14	5.03	4.05	1.34	1.00	2.52	22.6	13.5	36	9.7	46	49.3	17.2	25.8	70.4	0.88	1435.2	5.959	7.063
1	1	55	0	89	30	25	18	4.83	4.89	1.59	1.08	3.16	24	14.4	38.4	10.4	49	52.1	15.1	22.4	66.2	0.9	1496.4	6.748	7.583
1	1	51	0	85	45	26	61	4.30	4.68	4.08	0.88	2.53	25.6	15.3	40.8	11	52.2	55.6	12.8	18.7	53.3	0.87	1571.2	6.434	7.851
1	0	46	0	91	32	23	37	5.31	5.54	2.91	1.20	3.47	16.2	10.3	26.5	7	33.7	36	21.1	37	103.3	0.93	1146.6	4.78	5.623
1	1	61	1	95	20	20	15	4.81	5.79	1.02	1.54	4.08	27.3	16.3	43.6	11.8	55.7	59.3	18.6	23.9	88.5	0.99	1651	6.126	7.81
1	1	50	0	82	21	24	12	5.38	3.70	1.17	0.97	2.24	25	15.1	40.1	10.8	51.2	54.4	17.5	24.3	80.6	0.95	1545.9	6.209	7.701
1	1	67	1	77	19	27	27	5.42	5.01	3.85	1.35	2.37	25.5	15.3	40.8	11	52.1	55.5	20.9	27.4	92.7	0.93	1568.4	5.82	7.957
1	0	62	0	75	43	31	19	6.52	6.38	1.64	1.59	4.30	15.6	9.7	25.3	6.7	32.2	34.3	19.6	36.4	96.2	0.88	1110.9	5.107	5.784
1	1	43	0	90	73	48	128	9.21	6.57	14.32	0.66	1.70	23.8	14	37.8	10.3	48.3	51.3	16.1	23.9	72	0.95	1477.7	6.824	7.38
1	1	47	0	86	23	20	41	5.02	4.83	2.36	0.99	2.95	28.6	17	45.6	12.4	58.3	62.1	16.6	21	81.2	0.98	1712.2	6.708	7.878
1	0	61	0	79.5	37	25	46	4.46	6.55	0.72	1.81	4.36	15.9	9.9	25.8	6.9	32.8	35.2	22.8	39.4	111.2	0.94	1129.4	4.957	5.365
1	1	47	0	77	23	19	49	4.56	5.52	1.91	1.43	3.56	23.7	14	37.7	10.2	48.2	51.4	12.6	19.6	49	0.86	1480.9	6.617	7.317
1	1	66	1	90	15	18	33	6.57	5.09	3.08	1.00	2.89	23.3	14.1	37.4	10.1	47.8	50.9	18.2	26.3	79.6	0.92	1470.2	5.639	7.35
1	1	35	0	83	25	19	22	4.82	5.29	1.67	1.07	3.78	24.5	14.2	38.7	10.6	49.6	52.9	13.9	20.8	53	0.86	1512.9	7.089	7.591
1	1	44	0	90	24	19	18	4.65	5.02	0.90	1.25	3.23	24.7	14.5	39.1	10.7	50.1	53.3	18.3	25.6	83.3	0.96	1521.2	6.541	7.431
1	0	37	0	75.5	17	18	22	6.04	6.10	2.83	1.17	3.57	18.5	11.2	29.8	8	38	40.7	13.8	25.3	54.7	0.82	1249.4	5.663	6.3
1	1	42	0	88	42	27	28	4.57	5.52	1.79	0.88	4.07	23.9	14.1	38	10.3	48.6	52	18.7	26.4	76.7	0.88	1493.8	6.166	7.325
1	1	26	0	86.5	36	20	17	4.70	5.64	2.05	1.15	4.03	24.9	14.8	39.7	10.8	50.8	54.2	16.8	23.6	68.4	0.88	1541.5	6.369	7.716
1	0	37	0	67	18	14	14	4.52	4.88	2.00	1.34	3.02	16.7	10.3	27.1	7.2	34.5	36.8	14.3	27.9	63.5	0.86	1165.8	5.253	5.808
1	0	50	0	81	34	28	17	4.71	5.07	2.51	1.22	2.93	19.2	11.9	31	8.3	39.6	42.3	19	31	87.3	0.89	1283.7	5.353	6.502
1	1	53	0	79	16	17	43	7.89	8.01	7.81	1.00	4.37	25.8	15.1	40.8	11.1	52.3	55.7	22.1	28.4	91.4	0.89	1573	6.895	8.45
1	1	72	1	86.5	20	14	25	5.87	2.77	0.97	1.12	1.25	28	16.7	44.7	12.1	57.1	60.9	19.7	24.5	80.4	0.89	1684.4	6.03	8.878
1	1	60	1	88.3	18	23	27	6.57	4.50	1.74	1.10	2.52	23.4	13.8	37.2	10.1	47.6	50.8	15.7	23.6	61.8	0.86	1467.2	6.238	7.678
1	1	58	1	76.5	52	23	91	6.86	5.40	2.53	0.75	3.53	29.4	17.2	46.6	12.7	59.6	63.6	24.5	27.8	102.4	0.91	1744	6.72	9.256
1	1	47	1	87.2	29	18	30	6.78	6.08	2.66	1.03	4.20	23	13.5	36.5	10	46.7	49.8	22.5	31.1	99.4	0.91	1446	6.586	7.756
1	1	54	0	90	26	21	191	5.34	7.34	2.17	1.29	5.33	26.7	16	42.7	11.5	54.5	58.1	15.8	21.3	72.4	0.92	1625.7	6.394	7.709
1	1	56	0	85	14	14	14	5.24	4.46	1.08	1.18	2.82	24.2	14.7	38.9	10.4	49.6	53.1	15.1	22.2	62.6	0.87	1516.3	5.787	7.464
1	1	53	0	79	19	15	28	5.48	6.34	3.01	1.06	3.48	23.9	14.5	38.4	10.3	49	52.2	16.6	24.1	71.8	0.9	1497.2	5.868	7.794
1	1	63	1	84	22	16	20	7.27	2.82	2.78	0.76	1.18	26.5	15.8	42.3	11.5	54	57.5	24.2	29.6	113.1	1	1611.6	6.228	8.156
1	1	50	1	91	21	14	25	4.86	4.15	0.77	1.19	2.63	26.3	15.9	42.2	11.4	53.9	57.4	18.7	24.5	85.5	0.96	1610.6	5.806	7.795
1	1	46	0	90	12	10	20	5.39	4.89	1.58	1.40	3.39	24.8	14.8	39.7	10.7	50.7	54.1	20.5	27.5	87.6	0.9	1538	6.358	7.658
1	1	52	0	87	11	13	29	4.53	5.22	1.54	1.33	3.46	28.7	17.2	45.9	12.4	58.6	62.2	15.5	20	70	0.93	1713.1	6.486	8.78
1	1	43	0	83	18	15	24	4.77	4.27	0.99	1.24	2.60	24.7	14.9	39.7	10.7	50.6	53.9	16.4	23.4	73.7	0.91	1533.5	6.266	7.655
1	1	40	0	84	34	21	488	4.63	6.18	2.39	1.09	4.20	25	15.4	40.5	10.8	51.6	55	17.4	24.1	83.1	0.95	1557	5.755	7.532
1	0	28	0	77	26	18	15	4.96	5.54	1.25	1.34	3.83	19.1	11.6	30.8	8.3	39.2	42	22.9	35.3	106.8	0.94	1276.3	5.312	6.231
1	1	53	1	82	8	19	39	4.89	5.40	1.54	1.56	3.58	23.8	14.2	37.9	10.3	48.5	51.7	13.9	21.2	56.2	0.88	1486.6	6.399	7.402
1	1	43	0	81	20	25	115	5.02	5.87	1.38	1.13	4.27	23.4	13.7	37.1	10.1	47.5	50.5	15.1	23	61.5	0.88	1461.6	6.827	7.558
1	1	61	0	88	26	18	20	11.04	4.90	1.58	1.45	3.11	24.5	14.7	39.2	10.6	50.1	53.4	14.3	21.1	59.9	0.88	1523.4	6.45	7.639
1	0	69	0	78	24	22	15	5.18	3.91	1.27	1.44	2.10	17.8	11.5	29.3	7.7	37.2	39.6	20.7	34.4	103.2	0.93	1225	4.293	6.334
1	1	47	0	77	35	21	45	4.78	10.05	3.91	0.96	7.29	22.8	13.4	36.2	9.9	46.3	49.2	23.7	32.5	108.7	0.95	1433.4	7.091	7.493
1	1	47	0	81	29	19	62	5.32	5.75	1.38	1.35	3.82	21	12.4	33.4	9.1	42.7	45.5	13.2	22.5	53.1	0.86	1352.4	6.245	6.767
1	0	61	0	76	27	19	53	4.83	5.69	1.64	1.71	3.66	15	9.5	24.5	6.5	31.2	33.3	20.1	37.6	101.1	0.92	1089.3	4.702	5.253
1	1	23	0	78	25	19	54	4.32	5.48	0.97	1.24	3.95	25.5	14.8	40.2	11	51.5	54.8	16.4	23	70.1	0.93	1553.9	7.195	7.63
1	0	55	0	71	33	21	54	5.66	5.85	1.62	1.50	4.02	16.7	10.1	26.7	7.2	34.1	36.4	17.9	33	81.6	0.88	1156.2	5.415	5.89
1	0	64	0	80	32	34	75	8.60	7.98	2.68	1.81	5.66	14.8	9.3	24	6.4	30.6	32.6	17.9	35.4	93.1	0.89	1075	4.885	5.257
1	0	44	0	74	17	21	28	4.73	6.36	1.46	1.81	4.14	19.5	12.2	31.7	8.4	40.4	43.2	29.5	40.5	142.9	1	1304.2	4.833	6.325
1	1	40	0	92	15	15	76	5.01	5.48	1.80	1.15	3.66	22.8	14	36.8	9.9	46.9	50.1	16.3	24.6	75.4	0.94	1451.6	5.518	6.993
1	0	39	0	80	17	18	15	4.47	4.48	1.69	1.02	2.96	20.8	13	33.8	9	43.1	46.2	18.7	28.8	87.6	0.93	1367.5	4.828	6.495
1	0	59	1	83	17	20	16	5.16	5.19	1.52	1.42	3.45	17.6	11.2	28.7	7.6	36.5	38.9	18	31.6	87	0.89	1211	4.8	6.267
1	1	49	0	98	29	18	22	4.63	6.60	1.63	1.19	4.99	25.9	15.9	41.8	11.2	53.3	56.9	20.3	26.3	96.3	0.99	1598.5	5.592	7.446
1	0	57	1	73	22	16	25	4.87	6.39	1.40	1.56	4.44	15.9	10.2	26.1	6.9	33.2	35.5	17.4	33	83.3	0.91	1135.8	4.75	5.454
1	1	44	0	85	36	21	31	4.93	7.46	1.59	1.50	5.40	26.8	16.1	42.9	11.6	54.7	58.4	17.3	22.9	81.8	0.95	1630.8	6.237	7.659
1	0	41	0	82	14	16	26	5.09	4.49	1.05	1.03	3.20	17.7	10.9	28.7	7.7	36.5	39.1	23.1	37.1	108.2	0.88	1214.5	5.074	6.342
1	1	51	0	93	12	13	35	5.65	6.96	2.37	1.13	4.75	25.6	14.9	40.4	11	51.8	55.3	17.2	23.7	73.5	0.92	1564.3	7.011	7.576
1	1	46	0	86	39	27	29	5.02	5.70	2.46	0.80	4.08	22.8	13.3	36.1	9.8	46.2	49.3	15.8	24.3	63.9	0.88	1434.5	6.905	7.258
1	0	53	1	78	127	23	30	6.61	5.60	2.65	1.26	3.47	17.1	10.5	27.7	7.4	35.3	37.8	19.2	33.7	88.7	0.9	1186.7	4.896	5.822
1	1	35	0	79	71	100	457	14.01	8.85	3.59	1.48	6.18	25.4	14.7	40.1	11	51.4	54.6	16.9	23.6	70.2	0.91	1549.9	7.154	7.95
1	0	38	0	88	39	24	39	5.86	5.43	1.52	1.26	3.76	20.7	12.5	33.2	8.9	42.4	45.2	18.4	29	85.4	0.91	1345.3	5.91	6.824
1	1	38	0	86	44	35	55	4.87	6.19	1.70	1.32	4.14	25.4	14.7	40.1	11	51.4	54.6	16.9	23.6	70.2	0.91	1549.9	7.154	7.95
1	0	28	0	70	21	13	20	4.64	5.31	3.09	1.08	3.45	18.9	11.3	30.2	8.2	38.5	41.2	23.3	36.1	108.2	0.89	1259.9	6.091	6.603
1	0	53	0	72	21	17	14	6.20	6.09	2.60	1.27	3.95	14.8	9.4	24.2	6.4	30.7	32.8	18.4	36	96.6	0.9	1078.2	4.828	5.262
1	1	44	0	85	22	18	50	4.34	5.63	2.82	1.30	3.58	22.8	14.2	37	9.8	47.1	50.1	15.4	23.5	72.2	0.95	1451.9	5.347	7.246
1	1	56	0	88	31	20	26	5.96	6.25	1.47	1.24	4.50	25	15	40	10.8	51.1	54.4	17.1	23.9	75.2	0.92	1546	6.171	7.677
1	1	41	0	89	29	20	23	5.09	5.02	2.21	1.01	3.30	25.3	15.5	40.9	10.9	52.1	55.6	20	26.5	88.6	0.93	1570.9	5.796	7.735
1	1	46	0	85	21	18	48	5.01	4.46	1.74	1.10	2.89	24.5	14.6	39.2	10.6	50	53.2	16.4	23.5	73.3	0.93	1519.7	6.573	7.65
1	0	60	0	90	27	21	12	5.01	5.26	4.28	0.98	2.44	18.8	11.9	30.7	8.1	39	41.8	21.7	34.2	101	0.9	1272.1	4.938	6.455
1	1	61	1	89	25	17	13	5.91	4.96	4.61	0.81	2.56	26	16	42	11.2	53.5	57.1	14.5	20.3	60.6	0.86	1603.4	5.411	8.087
1	1	61	1	89	8	37	559	4.86	5.40	1.41	3.04	2.03	17.4	11.5	28.9	7.5	36.6	38.8	20.3	34.3	91.6	0.78	1208.9	4.121	7.023
1	1	42	0	82	25	18	24	4.82	4.72	1.22	1.10	3.18	26.7	15.8	42.5	11.6	54.4	57.9	14.7	20.3	61.6	0.89	1620.4	6.647	8.257
1	1	67	1	83	34	22	66	5.43	5.93	1.86	0.93	4.34	20	12	31.9	8.6	40.8	43.5	15.2	25.8	65.6	0.89	1310.4	5.865	6.469
1	1	48	0	83	23	18	40	5.74	4.87	1.43	1.01	3.48	23.3	13.8	37.2	10.1	47.5	50.6	14.9	22.7	62.8	0.88	1463.4	6.783	7.58
1	1	57	1	100	27	20	41	10.27	6.85	4.61	1.23	4.62	27	16.8	43.9	11.7	55.9	59.8	20.4	25.5	97.6	0.96	1660.8	5.382	7.756
1	1	61	1	93	19	20	19	5.90	3.77	0.77	1.06	2.57	23.4	14.1	37.5	10.1	47.9	51	17.5	25.6	75.9	0.9	1471.4	6.177	7.512
1	1	84	1	79	39	32	32	5.51	4.69	1.76	1.09	3.05	19.4	12.3	31.7	8.4	40.3	43	22.3	34.2	108.6	0.9	1298.4	4.582	7.044
1	1	29	0	86	19	14	21	4.80	5.23	1.75	1.25	3.72	28.1	16.6	44.7	12.1	57.2	60.9	13.7	18.3	57.6	0.88	1686.3	6.537	8.289
1	0	50	0	80	20	20	11	5.67	6.39	1.55	1.52	4.46	19.4	12.1	31.5	8.4	40.1	42.8	17.3	28.7	74.9	0.84	1295.2	5.074	6.752
